# Supplementary material
Source: PubMed Central journal article supplement (PMC6630958)
Supplement: nz9b00945_si_001.pdf [file nz9b00945_si_001.pdf]

## Supporting Information

# Unraveling the Role of Lithium in Enhancing the Hydrogen Evolution Activity of MoS<sub>2</sub>: Intercalation vs. Adsorption

Longfei Wu,<sup>†</sup> Nelson Y. Dzade,<sup>‡§</sup> Miao Yu,<sup>†</sup> Brahim Mezari,<sup>†</sup> Arno J. F. van Hoof,<sup>†</sup>  
Heiner Friedrich,<sup>⊥</sup> Nora H. de Leeuw,<sup>‡§</sup> Emiel J. M. Hensen,<sup>†</sup> and Jan P. Hofmann<sup>†\*</sup>

<sup>†</sup>Laboratory for Inorganic Materials and Catalysis, Department of Chemical Engineering and  
Chemistry, Eindhoven University of Technology, P.O. Box 513, 5600 MB Eindhoven, The  
Netherlands

<sup>‡</sup>Faculty of Geosciences, Utrecht University, Princetonlaan 8A, 3584 CB Utrecht, The Netherlands

<sup>§</sup>School of Chemistry, Cardiff University, Main Building, Park Place, CF10 3AT, Cardiff, United  
Kingdom

<sup>⊥</sup>Laboratory of Materials and Interface Chemistry, Department of Chemical Engineering and  
Chemistry, Eindhoven University of Technology, P.O. Box 513, 5600 MB, Eindhoven, The  
Netherlands

\*Email address of corresponding author: [J.P.Hofmann@tue.nl](mailto:J.P.Hofmann@tue.nl)

## TABLE OF CONTENTS

|                                                                                                                |            |
|----------------------------------------------------------------------------------------------------------------|------------|
| <b>Part I: Experimental and computational details</b>                                                          | <b>S4</b>  |
| Figure S1. Scheme of $\text{Li}_x\text{MoS}_2$ preparation on carbon support.                                  | S4         |
| <b>Part II: ICP-OES analysis</b>                                                                               | <b>S9</b>  |
| Table S1. ICP-OES analysis results of $\text{MoS}_2$ loaded on carbon support.                                 | S9         |
| Table S2. ICP-OES analysis results of $\text{MoS}_2$ loaded on alumina support.                                | S9         |
| <b>Part III: Characterization of <math>\text{Li}_x\text{MoS}_2</math></b>                                      | <b>S10</b> |
| Figure S2. TEM images and corresponding selected area electron diffraction (SAED) patterns.                    | S10        |
| Figure S3. Side view of the optimized structures of $\text{Li}_x\text{MoS}_2$ monolayers                       | S11        |
| Figure S4. Formation energies of $\text{Li}_x\text{MoS}_2$ monolayers                                          | S11        |
| <b>Part IV: Core-level binding energies of Mo-3d and S-2p in <math>\text{Li}_x\text{MoS}_2</math></b>          | <b>S12</b> |
| Figure S5. XP spectra of Mo 3d.                                                                                | S12        |
| Table S3. Summary for the binding energies of Mo (IV)-S bond.                                                  | S12        |
| Figure S6. XP spectra of S 2p.                                                                                 | S13        |
| Table S4. Summary for the atomic ratio of sulfur species.                                                      | S13        |
| Table S5. Summary for core level binding energy of Mo-3d and S-2p                                              | S14        |
| <b>Part V: <math>^7\text{Li}</math> MAS NMR</b>                                                                | <b>S15</b> |
| Figure S7. Solid-state Magic Angle Spinning $^7\text{Li}$ NMR spectra of $\text{Li}_x\text{MoS}_2$ .           | S15        |
| Figure S8. $^7\text{Li}$ - $^7\text{Li}$ MAS NMR spectra of $\text{Li}_{2.06}\text{MoS}_2/\text{C}$ .          | S16        |
| <b>Part VI: FTIR-NO adsorption spectroscopy</b>                                                                | <b>S16</b> |
| Figure S9. FTIR spectra of incremental dose of NO adsorbed on molybdenum sulfide.                              | S16        |
| Figure S10. FTIR spectra of Mo after dosing NO with a molecular ratio of 0.52 to Mo.                           | S17        |
| Figure S11. NO titration curve of Mo with IR band area integrated between 1500 and 1810 $\text{cm}^{-1}$ .     | S17        |
| <b>Part VII: Bond structure in <math>\text{Li}_x\text{MoS}_2</math></b>                                        | <b>S18</b> |
| Figure S12. <i>Ex-situ</i> XANES spectra                                                                       | S18        |
| Figure S13. Mo-K edge EXAFS spectra plotted as $\chi(k)$ with k-weight of 3.                                   | S19        |
| Table S6. Average charge and variance of Mo and S atoms in $\text{Li}_x\text{MoS}_2$                           | S20        |
| Table S7. DFT calculated Mo-S and Mo-Mo bond distances in $\text{Li}_x\text{MoS}_2$ monolayer                  | S20        |
| <b>Part VIII: Electrochemical characterization</b>                                                             | <b>S21</b> |
| Figure S14. Scheme for electrode preparation                                                                   | S21        |
| Figure S15. Cyclic voltammetry and EIS curves of $\text{Li}_x\text{MoS}_2$ in 0.1 M $\text{H}_2\text{SO}_4$ .  | S21        |
| Figure S16. Electrochemical double layer capacitance ( $C_{dl}$ ) measurements for $\text{Li}_x\text{MoS}_2$ . | S22        |
| Figure S17. Calculated fraction of Mo corner and edge sites as a function of particle size.                    | S23        |
| Table S8. Calculated number of active sites ( $N_{active}$ ) based on NO titration.                            | S23        |
| Figure S18. XP spectra of $\text{Li}_x\text{MoS}_2$ catalysts after HER.                                       | S24        |
| Figure S19. LSV curves of $\text{Li}_x\text{MoS}_2$ after washing with MilliQ water                            | S25        |
| <b>Part IX: Raman spectroscopy</b>                                                                             | <b>S25</b> |
| Figure S20. Raman spectra of $\text{Li}_x\text{MoS}_2$                                                         | S25        |

|                                                                                                           |            |
|-----------------------------------------------------------------------------------------------------------|------------|
| <b>Part IIX: Hydrogen adsorption on <math>\text{Li}_x\text{MoS}_2</math></b>                              | <b>S26</b> |
| Figure S21. Structures and PDOS of 2H and 1T $\text{MoS}_2$ monolayers                                    | S26        |
| Figure S22. Structure of pristine Mo-edge of 1T- $\text{MoS}_2$ monolayer                                 | S26        |
| Table S9. Calculated vibrational frequencies of H adsorbed on the $\text{Li}_x\text{MoS}_2$ .             | S27        |
| Figure S23. $\Delta G_H$ on Mo-edge of $\text{Li}_x\text{MoS}_2$ monolayer                                | S27        |
| Figure S24. Electron density difference isosurface contours for H adsorption on Mo-edge                   | S28        |
| Figure S25. $\Delta G_H$ on S-edge of $\text{Li}_x\text{MoS}_2$ monolayer with different Li concentration | S28        |
| Figure S26. $\Delta G_H$ on Mo-edge of 2H- $\text{MoS}_2$ monolayer with and without Li adsorption        | S29        |
| Figure S27. $\Delta G_H$ on S-edge of 2H- $\text{MoS}_2$ monolayer with and without Li adsorption         | S29        |
| <b>References</b>                                                                                         | <b>S29</b> |

## Part I: Experimental and computational details

### Chemicals

Ammonium heptamolybdate tetrahydrate ( $(\text{NH}_4)_6\text{Mo}_7\text{O}_{24} \cdot 4\text{H}_2\text{O}$ , > 99.3 %) and  $\text{LiNO}_3$  ( $\geq 98.0$  %) were purchased from Merck. Activated carbon (NORIT RX-3 extra) was sieved to 125 – 250  $\mu\text{m}$  and had a pore size of  $1 \text{ cm}^3 \text{ g}^{-1}$ .  $\gamma$ -alumina was sieved to 75-125  $\mu\text{m}$  and had a pore size of  $0.65 \text{ cm}^3 \text{ g}^{-1}$ . Sulfuric acid ( $\text{H}_2\text{SO}_4$ , 99.999 %) was purchased from Sigma-Aldrich. To prepare a 0.1M  $\text{H}_2\text{SO}_4$  electrolyte, 2.665 mL sulfuric acid was added to a certain amount of Milli-Q water (18 M $\Omega$  cm) and filled up to 500 mL in a volumetric flask. All chemicals and materials were used as received without further purification.

### Catalyst preparation

The  $\text{Li}_x\text{MoS}_2$  catalysts were prepared by impregnation of activated carbon (pore volume  $1 \text{ cm}^3 \text{ g}^{-1}$ ) with aqueous solutions of the precursors. Typically, a certain amount of  $(\text{NH}_4)_6\text{Mo}_7\text{O}_{24} \cdot 4\text{H}_2\text{O}$  and  $\text{LiNO}_3$  were dissolved in 3 mL water, and the as-prepared solution was transferred and filled up to 10 mL in a volumetric flask. 500  $\mu\text{L}$  precursor solution was impregnated to 500 mg activated carbon. Then, the catalysts were left on the roller band for 2 h and dried overnight at 110  $^\circ\text{C}$ . The dried catalysts (100 mg) were sulfurized in 10 %  $\text{H}_2\text{S}$  in  $\text{H}_2$  ( $40 \text{ ml min}^{-1}$ ) at 350  $^\circ\text{C}$  under atmospheric pressure for 2 h with a heating rate of 6  $^\circ\text{C min}^{-1}$ . Li/Mo composition was determined by ICP-OES analysis as shown in Tables S1 and 2.

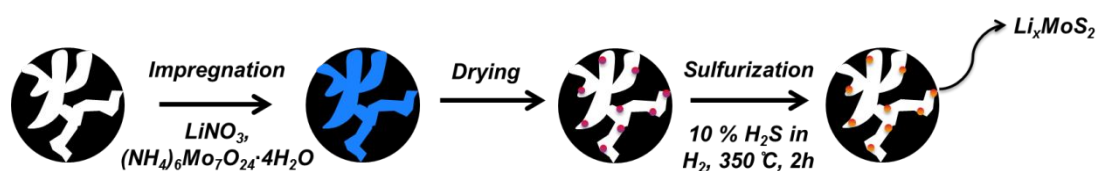

Figure S1. Scheme of the synthetic process of  $\text{Li}_x\text{MoS}_2$  on carbon support.

### Materials characterization

XPS measurements were conducted on a ThermoScientific K-Alpha spectrometer with a monochromatic X-ray source ( $E(\text{Al K}\alpha) = 1486.6 \text{ eV}$ ). The spectra were calibrated by setting the  $\text{sp}^3 \text{ C } 1\text{s}$  peak of adventitious carbon to 284.6 eV and fitted by CasaXPS software using a Shirley background subtraction and Gaussian (70%)-Lorentzian (30%) line shapes. Survey scans were collected at constant pass energy of 200 eV and region scans at 50 eV.  $^7\text{Li}$  NMR experiments were performed on a Bruker Avance DMX500 instrument operating at 194 MHz for  $^7\text{Li}$  in a magnetic field of 11.7 Tesla. The measurements were carried out using a 2.5-mm MAS probe head with a sample rotation rate of 20 kHz.  $^7\text{Li}$  1D spectra were recorded with a single pulse sequence with a  $90^\circ$  pulse duration of 5  $\mu\text{s}$  and an interscan delay of 320 s. Higher interscan delays showed no significant increase in intensity. 2D exchange

(NOESY) spectra were recorded by use of a pulse sequence  $p1-d_0-p1-t_{\text{mix}}-p1$ -acquisition ( $90^\circ$  pulse  $p1 = 5 \mu\text{s}$ , delay time  $d_0 = 2.5 \mu\text{s}$  and mixing times  $t_{\text{mix}}$  of  $10 \mu\text{s}$ ,  $100 \mu\text{s}$ ,  $100 \text{ms}$ , and  $1\text{s}$ ). An interscan delay of  $3 \text{s}$  was chosen. The  $^7\text{Li}$  chemical shift is referred to a saturated aqueous  $\text{LiCl}$  solution. The different samples were loaded in a  $2.5\text{-mm}$  zirconia NMR rotor in a glovebox and closed with an SP1 cap. Afterwards, the rotor was transported to the NMR probe head under  $\text{N}_2$  atmosphere. TEM images were acquired with a Tecnai 20 transmission electron microscope (FEI company, now Thermo Fisher Scientific) equipped with a  $\text{LaB}_6$  filament and operated at an acceleration voltage of  $200 \text{kV}$ . The sulfurized catalysts were transported to an argon filled glovebox and dispersed in dry  $n$ -hexane, then a few droplets were placed on Cu TEM grids. The grid was transported in a GATAN vacuum transfer holder (Model number CHVT3007). Infrared spectra were recorded on a Nicolet FT-IR spectrometer equipped with a liquid  $\text{N}_2$ -cooled MCT detector. IR pellets ( $D = 13 \text{mm}$ ) were prepared from catalysts impregnated on  $\gamma$ -alumina (pore volume  $0.65 \text{cm}^3 \text{g}^{-1}$ ) support, the samples were pressed as a self-supporting wafers of around  $10 \text{mg cm}^{-2}$ . Then, the pellets were placed in a home-made *in-situ* cell equipped with  $\text{CaF}_2$  windows, and sulfurized at  $350 \text{ }^\circ\text{C}$  for  $2 \text{h}$  ( $6 \text{ }^\circ\text{C min}^{-1}$ ) with  $10 \%$   $\text{H}_2\text{S}$  in  $\text{H}_2$  ( $40 \text{mL min}^{-1}$ ). After cooling down to room temperature, the cell was flushed with  $\text{N}_2$  for  $15 \text{mins}$ . Afterwards, the sample was heated again to  $350 \text{ }^\circ\text{C}$  for  $1 \text{h}$  ( $6 \text{ }^\circ\text{C min}^{-1}$ ), and the cell as evacuated overnight to reach a pressure below  $10^{-5} \text{mbar}$ . The MCT detector was cooled down with liquid  $\text{N}_2$ , and molecular  $\text{NO}$  was passed through a liquid  $\text{N}_2/1$ -propanol cold trap and introduced via a calibrated sample loop connected to a pressure gauge. Spectra were recorded (256 scans, resolution:  $2 \text{cm}^{-1}$ ) after each aliquot up to an equilibrium of around  $0.6 \text{mol (NO) mol (Mo)}^{-1}$ . All spectra were baseline corrected in the range of  $1200\text{-}2200 \text{cm}^{-1}$  in OMNIC software and presented in absorbance mode.

X-ray absorption spectroscopy (XAS) was performed at the Dutch-Belgian beamline BM26A (DUBBLE) at the European Synchrotron ESRF, operating at  $6 \text{GeV}$  with a beam current of  $200 \text{mA}$ .  $\text{Li}_x\text{MoS}_2/\text{C}$  samples were mounted as self-supporting wafers by dispersing  $50 \text{mg}$  catalysts in  $50 \text{mg}$  cellulose. Then, the mixtures were grinded and pressed by a manual press and sealed with Kapton foil in a glovebox. Mo foil was used as a reference for energy calibration, all spectra were collected in transmission mode at the Mo K-edge ( $20 \text{keV}$ ). EXAFS spectra were background subtracted with Athena and fitted with Artemis software<sup>30</sup>. Scattering paths were calculated by FEFF6<sup>30</sup> from molybdenite ( $\text{MoS}_2$ ) crystal structure from American Mineralogist Crystal Structure Database<sup>31</sup>. The fitting range of Mo K-edge was  $\Delta k = 2\text{-}12 \text{ \AA}^{-1}$  and  $\Delta R = 1\text{-}3 \text{ \AA}$ . Plotted spectra were not phase-corrected and have a  $k$ -weight of 3. 1T' to 2H phase ratio was determined by the coordination number (CN) ratio of Mo-Mo (distorted) and Mo-Mo bond.

## Electrochemical measurements

Electrochemical tests were performed in a three-electrode electrochemical cell with a saturated Hg(l)/Hg<sub>2</sub>Cl<sub>2</sub>(s)/KCl electrode as reference, Pt foil as counter electrode and catalysts modified glassy carbon electrodes (GCE) as working electrodes (electrode preparation details can be found in SI, Part IV). The reference electrode was calibrated with respect to a reversible hydrogen electrode (RHE), and has a potential of +0.269 V vs. RHE. HER measurements were carried out in Ar saturated 0.1 M H<sub>2</sub>SO<sub>4</sub>, CV and LSV curves were recorded at scan rate of 50 and 5 mV s<sup>-1</sup>, respectively. Electrochemical impedance spectroscopy (EIS) was carried out from 100 kHz to 1 Hz at open circuit potential (OCP) (Figure S15). To evaluate the electrochemical active surface area (ECSA), CV curves were recorded from  $V_{\text{OCP}} - 0.05$  to  $V_{\text{OCP}} + 0.05$  V with scan rates of 20, 40, 60, 80, 100 mV s<sup>-1</sup>. The double layer capacitance ( $C_{dl}$ ) was extracted by plotting  $\Delta j = j_a - j_c$  ( $j_a$  and  $j_c$  corresponds to anodic and cathodic current densities, respectively) at  $V_{\text{OCP}}$  against the CV scan rates with the following equation:  $\frac{j_a - j_c}{2} = C_{dl} \frac{dE}{dt}$ . The current density for both CV and LSV curves was normalized by the geometric surface area of the electrode. For HER stability tests, a total weight of 5 mg Li<sub>x</sub>MoS<sub>2</sub>/C catalyst was mixed with 40  $\mu$ L 20 % wt. Nafion® solution to yield a slurry, which subsequently was daubed uniformly on carbon fiber paper (CFP) and dried in vacuum at 100 °C for 24h. Afterwards, the CFP electrode was attached on copper wire by conductive silver paste and sealed with nonconductive epoxy for HER measurements.

## TOF calculation

To evaluate the hydrogen evolution reaction (HER) rate per active site and per time (defined as TOF, s<sup>-1</sup>), the number of active sites ( $N_{\text{active}}$ ) were determined. Here, we assumed that Mo-edges are active sites for HER. Then, based on NO titration curves (Figure S11), we can calculate the fraction of Mo-edges ( $\sim 0.2 \pm 0.02$ ).<sup>1</sup> As the Mo loading amount was determined by ICP-OES, the number of Mo-edges on GCE can be determined by the following equation:

$$N_{\text{active}} = \frac{m \times 0.001 \times \text{wt}\% \times N_A}{M(\text{Mo})} \times 0.2$$
, where  $m$  is the loading of catalyst on the electrode (0.1 mg in our case),  $S$  is the geometric electrode area (0.2826 cm<sup>2</sup> in our case),  $\text{wt}\%$  is the weight percentage of Mo determined by ICP,  $N_A$  is the Avogadro constant ( $6.022 \times 10^{23} \text{ mol}^{-1}$ ). The TOF was then determined by the equation  $\text{TOF} (\text{s}^{-1}) = \frac{j (\text{A cm}^{-2}) \times S (\text{cm}^2) \times \frac{1}{2}}{N_{\text{active}} \times q_e}$ ,  $j$  was derived from the current generated during HER,  $S$  is the geometric surface area of the working electrode, and  $q_e$  is the electron charge ( $1.602 \times 10^{-19} \text{ C}$ ).

## Computational details

First-principles calculations were performed using the Vienna ab-initio simulation (VASP) package,<sup>2,3</sup> a periodic

plane wave DFT code which includes the interactions between the core and valence electrons using via the Projector Augmented Wave (PAW) method.<sup>4</sup> The electronic exchange-correlation potential was calculated using the GGA-PBE functional.<sup>5</sup> Wave functions were expanded in a plane wave basis with a high energy cutoff of 600 eV and the convergence criterion was set to  $10^{-6}$  eV between two ionic steps for the self-consistency process. A vacuum region of 20 Å was added along the normal direction to the MoS<sub>2</sub> monolayers to avoid interactions between adjacent images. The Brillouin zone was sampled using a  $9 \times 9 \times 1$  Monkhorst-Pack  $k$ -point mesh. Van der Waals dispersion forces were accounted for in all calculations through the Grimme DFT-D3 functional,<sup>6</sup> which adds a semi-empirical dispersion potential to the conventional Kohn–Sham DFT energy.<sup>7</sup> In order to obtain the equilibrium lattice constant, full relaxations were conducted on the 2H and 1T MoS<sub>2</sub> monolayers in Figure S18. The lattice constant of the 2H-MoS<sub>2</sub> is 3.168 Å, the bond length of Mo–S and Mo–Mo is 2.415 Å and 3.168 Å, respectively, whereas the lattice constant of the 1T-MoS<sub>2</sub> monolayer is 3.192 Å, where Mo–S and Mo–Mo bond lengths are 2.421 Å and 3.192 Å, respectively. The 2H-MoS<sub>2</sub> is shown to be a semiconductor with a bandgap of 1.59 eV (Figure S18a), whereas the 1T-MoS<sub>2</sub> monolayer is metallic (Figure S18b) in excellent agreement with earlier theoretical predictions.<sup>8</sup> Both valence and conduction bands of the 2H-MoS<sub>2</sub> are composed mainly of the Mo 3d states and some S 3p states, similar to the electronic states around the Fermi level of the 1T-MoS<sub>2</sub>. The optimized monolayers were used to truncate the MoS<sub>2</sub> structures to obtain Mo-terminated edges along the (10 $\bar{1}$ 0)-2H and (0001)-1T crystallographic planes for the Gibbs free energy of hydrogen adsorption ( $\Delta G_H$ ) calculations. A vacuum region of 20 Å was added along the normal direction to the Mo-edges to avoid interactions between adjacent images. A single Mo-edge row separated by 15 Å vacuum was considered in the y-direction, so that this layer was also isolated in this direction. The modeled structures involve the monolayer 1T-MoS<sub>2</sub> with increasing lithium ions adsorbed on both sides of the layer, as shown in Figure S18. The surface formation energy ( $E_{surf-form}$ ) of the Mo-edge surfaces without and with adsorbed Li is calculated using equations (1) and (2) respectively:

$$E_{surf-form} = \frac{E_{Mo-edge}^{relaxed} - nE_{bulk}^{relaxed}}{2A} \quad (1)$$

$$E_{surf-form} = \frac{E_{Mo-edge}^{relaxed} + mLi - nE_{bulk}^{relaxed} - mE_{Li}}{2A} \quad (2)$$

where  $E_{Mo-edge}^{relaxed}$  is the energy of the relaxed slab,  $nE_{bulk}^{relaxed}$  is the energy of an equal number ( $n$ ) of bulk MoS<sub>2</sub> units,  $mE_{Li}$  is the energy of an equal number ( $m$ ) of bulk Li metal (per atom) and  $A$  is the area of the surface.

Bader population analyses were carried out using the code developed by Henkelman and co-workers<sup>9</sup> in order to quantify charge changes in the S and Mo atoms after Li adsorption. Insight into the electron density redistributions within the Li <sub>$x$</sub> MoS<sub>2</sub> monolayers due to the adsorption of Li atoms was gained through a differential charge-density difference ( $\Delta\rho$ ) isosurface analysis obtained using equation (3):

$$\Delta\rho = \rho_{Li-MoS_2} - (\rho_{MoS_2} + \rho_{Li-layer}) \quad (3)$$

where  $\rho$  is the electronic charge density and the subscripts  $Li-MoS_2$ ,  $MoS_2$ , and  $Li-layer$  refer to the adsorbate-substrate Li-MoS<sub>2</sub> monolayer, isolated MoS<sub>2</sub> monolayer and isolated adsorbate Li-layer, respectively. The atomic positions of the isolated MoS<sub>2</sub> monolayer and of the Li array are kept the same as those of the total Li-MoS<sub>2</sub> system, which ensures that the presentation highlights local electron density rearrangement due the adsorption process. Similarly, the insight into local charge rearrangement within the Li <sub>$x$</sub> MoS<sub>2</sub>+H system was gained from the electron

density difference isosurfaces (Figure S21) was obtained by subtracting from the electron density of the total  $\text{Li}_x\text{MoS}_2+\text{H}$  system, both the electron density of the naked  $\text{Li}_x\text{MoS}_2$  surface and that of an isolated H atom:  $\Delta\rho = \rho(\text{Li}_x\text{MoS}_2 + \text{H}) - [\rho(\text{Li}_x\text{MoS}_2) + \rho(\text{H})]$ .

The core-level binding energy ( $E_{\text{CL}}$ ), which is the energy required to remove a core electron from the atom of interest was calculated as the energy difference between two separate calculations (so-called  $\Delta\text{SCF}$  approach)<sup>10, 11</sup> based on the equation:  $E_{\text{CL}} = E(n_c - 1) - E(n_c)$ . The first involves a standard DFT calculation, wherein the number of core electrons corresponds to the unexcited ground state [ $E(n_c)$ ], whereas in the second calculation, one electron is removed from the core of one particular atom and added to the valence or conduction band [ $E(n_c - 1)$ ]. Core-level binding energy shifts ( $E_{\text{CLS}}$ ) represent the changes in binding of specific core electrons ( $E_{\text{CL}}$ ) of atoms of interest compared to reference atoms, which are typically located in a different environment, as per the equation  $E_{\text{CLS}} = E_{\text{CL}} - E_{\text{CL}}^{\text{ref}}$ . The calculated  $E_{\text{CLS}}$  can be compared directly to X-ray photoelectron spectroscopy (XPS) binding energy shifts in order to gain detailed atomic-level understanding of adsorption sites and structures. However, due to lack of accounting for relativistic effects and screening by the core electrons in the PAW potential (*i.e.* the other core electrons are kept frozen in the configuration for which the PAW potential was generated after a single core electron is excited from the core to the valence) the approach does not yield absolute values for the core level binding energies. But test for variety of systems suggest that calculated core level binding energy shifts (differences in the binding energies) can be estimated well within the XPS experimental accuracy of 0.1 eV using Hartree–Fock (HF) or Density Functional Theory (DFT) based calculations.<sup>12, 13</sup>

The hydrogen evolution reaction (HER) is a classic example of a two-electron transfer reaction with one catalytic intermediate,  $\text{H}^*$  (where \* denotes a site on the surface able to bind to hydrogen), and may occur through either the Volmer-Heyrovsky ( $\text{H}^+ + \text{e}^- + \text{H}^* \rightarrow \text{H}_2 + *$ ) or the Volmer-Tafel ( $2\text{H}^* \rightarrow \text{H}_2 + 2*$ ) mechanism.<sup>14</sup> The free energy of  $\text{H}^+ + \text{e}^-$  is the same as that of  $\frac{1}{2} \text{H}_2$  at standard conditions.<sup>15, 16</sup> The Gibbs free energy of hydrogen adsorption ( $\Delta G_{\text{H}}$ ), the best known descriptor for the hydrogen evolution activity, was calculated by the free energy with respect to molecular hydrogen including zero-point energy and entropy terms via:

$$\Delta G_{\text{H}} = \Delta E_{\text{H}} + \Delta E_{\text{ZPE}} - T\Delta S_{\text{H}} \quad (4)$$

where  $\Delta E_{\text{H}}$  is the adsorption energy of hydrogen which is defined as:

$$\Delta E_{\text{H}} = E_{\text{MoS}_2 + \text{H}} - E_{\text{MoS}_2} - \frac{1}{2}E_{\text{H}_2} \quad (5)$$

The vibrational and configurational entropies of the adsorbed  $\text{H}^*$ -intermediate are assumed to be negligible, and thus the entropy difference is simply  $\Delta S_{\text{H}} \approx -\frac{1}{2}S_{\text{H}_2} = -0.7 \text{ meV K}^{-1}$ , where  $S_{\text{H}_2}$  is the entropy of molecule hydrogen in gas phase. The zero-point energy of a studied system is defined as the sum over all ground state vibrational modes using the equation:

$$E_{\text{ZPE}} = \frac{hc}{2} \sum_i^{\text{modes}} \nu_i \quad (6)$$

where  $h$  is the Planck constant and  $\nu_i$ 's are the calculated vibrational frequencies. The ground state vibrational frequency of the gas phase  $\text{H}_2$  is obtained at  $4400 \text{ cm}^{-1}$ .<sup>7</sup> Using the calculated vibrational frequencies of H adsorbed on the  $\text{Li}_x\text{MoS}_2$  (**Table S9**) the ZPE-contribution to the Gibbs free energy of hydrogen adsorption can be calculated



as  $\Delta E_{ZPE} = E_{ZPE}^H - \frac{1}{2}E_{ZPE}^{H_2}$ , which we found to be in the range of approximately 0.02–0.06 eV. Evaluating the entropic term at a temperature of 298 K gives  $-T\Delta S_H \approx 0.2$  eV, and therefore the correction to the Gibbs free energy of hydrogen adsorption is determined to be approximately in the range of 0.22–0.26 eV on the  $Li_xMoS_2$  systems, which is consistent with previous theoretical predictions.<sup>15, 16</sup>

## Part II: ICP-OES analysis

MoS<sub>2</sub> loaded on carbon support: 25 mg sample was weighed and put into a beaker, then 5 mL sulfuric acid (1:1 volume ratio with water) were added. The beaker was placed on a hot plate in the fume cupboard, heated and stirred until the catalyst is dissolved. Afterwards, the solution was cooled down to room temperature, then a few mL of distilled water were added and mixed together. Thereafter, the solution was transferred to a 50 mL volumetric flask and filled up with distilled water. After the carbon residue has settled to the bottom of the flask, the clear solution on top was taken out and diluted 5 times. Table S1 summarizes the ICP-OES analysis results of catalysts loaded on carbon support.

Table S1. ICP-OES analysis results of MoS<sub>2</sub> loaded on carbon support.

| Sample name                            | Mo wt. % | Li wt. % | Li : Mo (molar ratio) |
|----------------------------------------|----------|----------|-----------------------|
| MoS <sub>2</sub> /C                    | 8.36     | -        | -                     |
| Li <sub>0.14</sub> MoS <sub>2</sub> /C | 8.65     | 0.08     | 0.14                  |
| Li <sub>0.29</sub> MoS <sub>2</sub> /C | 8.45     | 0.18     | 0.29                  |
| Li <sub>0.48</sub> MoS <sub>2</sub> /C | 8.15     | 0.28     | 0.48                  |
| Li <sub>1.00</sub> MoS <sub>2</sub> /C | 8.00     | 0.58     | 1.00                  |
| Li <sub>2.06</sub> MoS <sub>2</sub> /C | 6.58     | 0.98     | 2.06                  |

MoS<sub>2</sub> loaded on alumina support: 25 mg sample was weighed and put into a beaker, then after adding 5 mL sulfuric acid (1:1 volume ratio with water), the beaker was placed on the hot plate in the fume cupboard, heated and stirred until the catalyst was dissolved. The solution was cooled down to room temperature, then a few mL of distilled water were added and mixed together. Afterwards, the solution was transferred to a 50 mL volumetric flask and filled up with distilled water. The as-prepared solution was diluted 5 times for the ICP-OES measurement. Table S2 summarizes the ICP-OES results of catalysts loaded on alumina support.

Table S2. ICP-OES analysis results of MoS<sub>2</sub> loaded on alumina support.

| Sample name                                                         | Mo wt. % | Li wt. % | Li : Mo (molar ratio) |
|---------------------------------------------------------------------|----------|----------|-----------------------|
| MoS <sub>2</sub> /Al <sub>2</sub> O <sub>3</sub>                    | 8.28     | -        | -                     |
| Li <sub>0.08</sub> MoS <sub>2</sub> /Al <sub>2</sub> O <sub>3</sub> | 8.66     | 0.66     | 0.08                  |
| Li <sub>0.30</sub> MoS <sub>2</sub> /Al <sub>2</sub> O <sub>3</sub> | 8.36     | 0.18     | 0.30                  |
| Li <sub>0.61</sub> MoS <sub>2</sub> /Al <sub>2</sub> O <sub>3</sub> | 8.51     | 0.38     | 0.61                  |
| Li <sub>1.22</sub> MoS <sub>2</sub> /Al <sub>2</sub> O <sub>3</sub> | 7.92     | 0.70     | 1.22                  |
| Li <sub>2.37</sub> MoS <sub>2</sub> /Al <sub>2</sub> O <sub>3</sub> | 7.58     | 1.30     | 2.37                  |

Part III: Characterization of  $\text{Li}_x\text{MoS}_2$  particles

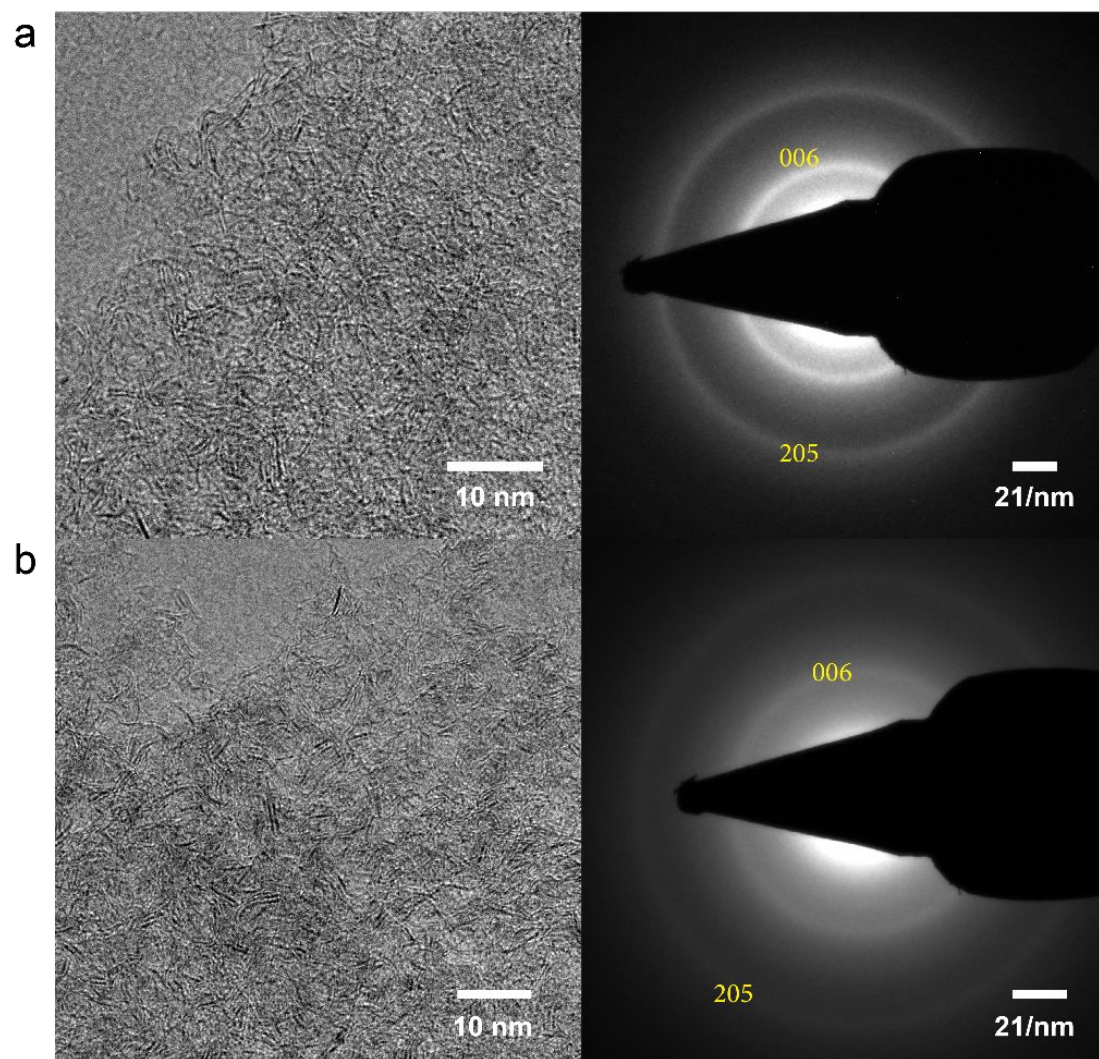

Figure S2. HR-TEM images and corresponding selected area electron diffraction (SAED) patterns of  $\text{MoS}_2$  (a) and  $\text{Li}_{0.29}\text{MoS}_2$  (b) on carbon support.

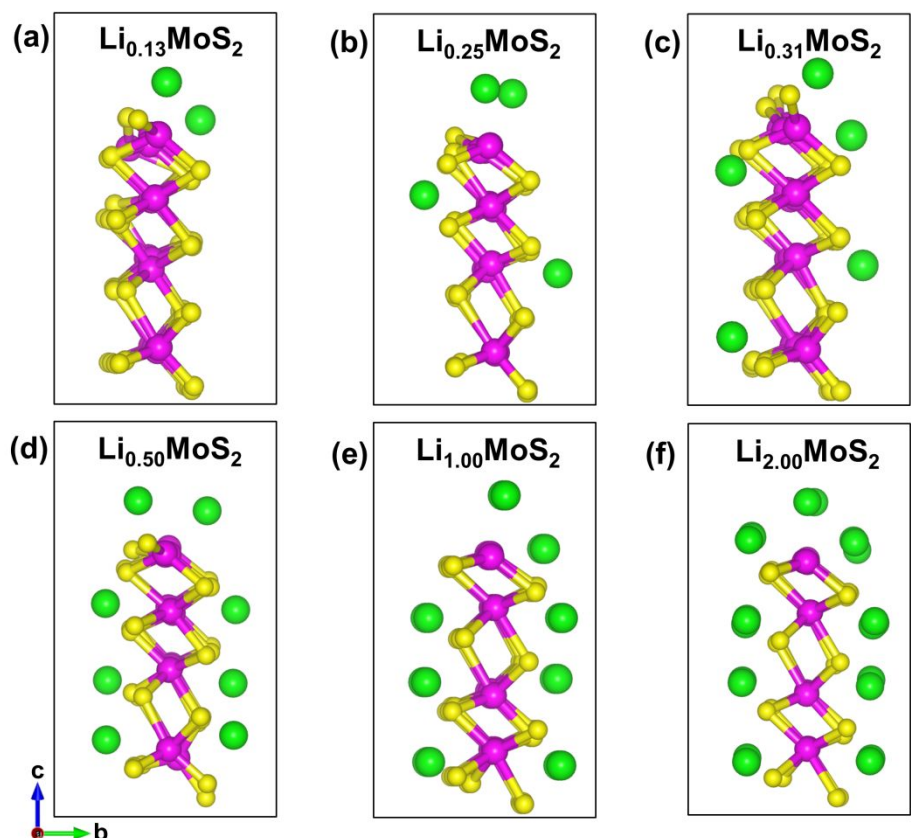

Figure S3. Side view of the optimized structures of  $\text{Li}_x\text{MoS}_2$  monolayers with increasing Li concentration. a,  $\text{Li}_{0.13}\text{MoS}_2$ ; b,  $\text{Li}_{0.25}\text{MoS}_2$ ; c,  $\text{Li}_{0.31}\text{MoS}_2$ ; d,  $\text{Li}_{0.50}\text{MoS}_2$ ; e,  $\text{Li}_{1.00}\text{MoS}_2$ ; f,  $\text{Li}_{2.00}\text{MoS}_2$ . A vacuum size of 20 Å was added in the c direction perpendicular to the Mo-edge.

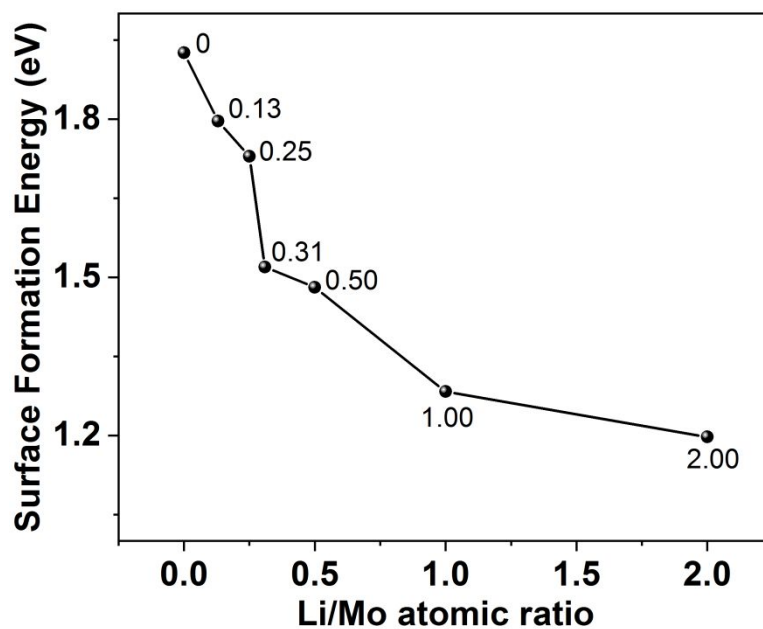

Figure S4. The surface formation energies of  $\text{Li}_x\text{MoS}_2$  monolayers with increasing Li concentration.

Part IV: Core-level binding energies of Mo 3d and S 2p in  $\text{Li}_x\text{MoS}_2$

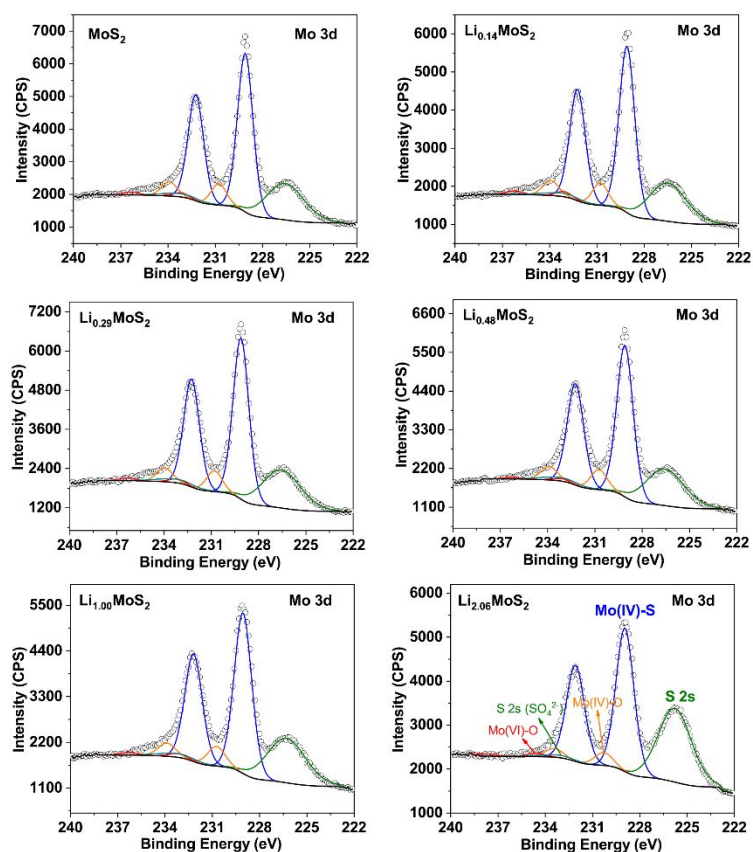

Figure S5. Mo 3d XP spectra for samples with various Li loading on carbon support.

Table S3. Summary for the binding energy of Mo (IV)-S bond with different Li loading on carbon support.

| Sample name                    | Mo (IV)-S           |
|--------------------------------|---------------------|
|                                | Binding Energy (eV) |
| $\text{MoS}_2$                 | 229.1               |
| $\text{Li}_{0.14}\text{MoS}_2$ | 229.1               |
| $\text{Li}_{0.29}\text{MoS}_2$ | 229.1               |
| $\text{Li}_{0.48}\text{MoS}_2$ | 229.1               |
| $\text{Li}_{1.00}\text{MoS}_2$ | 229.0               |
| $\text{Li}_{2.06}\text{MoS}_2$ | 228.9               |

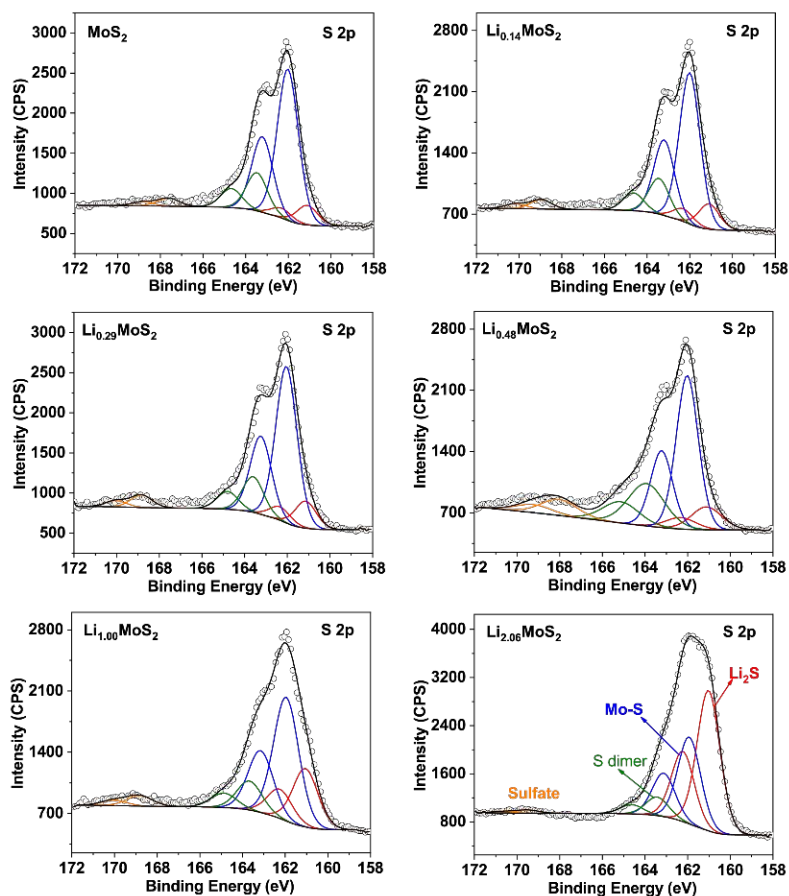

Figure S6. S 2p XPS spectra for samples with various Li loading on carbon support.

Table S4. Summary for the atomic percentage of sulfur species based on S 2p spectra.

| Sample                              | % At. Conc.<br>(Electron rich S <sup>2-</sup> ) | % At. Conc. (S <sup>2-</sup> ) | % At. Conc.<br>(S in S <sub>2</sub> <sup>2-</sup> ) | % At. Conc. (Sulfate) |
|-------------------------------------|-------------------------------------------------|--------------------------------|-----------------------------------------------------|-----------------------|
| MoS <sub>2</sub>                    | 9.8                                             | 52.8                           | 28.3                                                | 9.1                   |
| Li <sub>0.14</sub> MoS <sub>2</sub> | 11.9                                            | 53.5                           | 25.7                                                | 8.9                   |
| Li <sub>0.29</sub> MoS <sub>2</sub> | 13.2                                            | 53.5                           | 23.9                                                | 9.5                   |
| Li <sub>0.48</sub> MoS <sub>2</sub> | 11.2                                            | 54.6                           | 24.8                                                | 9.4                   |
| Li <sub>1.00</sub> MoS <sub>2</sub> | 32.9                                            | 37.7                           | 21.2                                                | 8.2                   |
| Li <sub>2.06</sub> MoS <sub>2</sub> | 41.3                                            | 42.8                           | 12.6                                                | 3.3                   |

Table S5: Summary for the DFT-based core-level binding energies ( $E_{CL}$ ) of Mo-3d and S-2p in  $\text{Li}_x\text{MoS}_2$  and their shift relative to  $\text{MoS}_2$  at different Li concentrations.

| Sample name                    | Mo-3d (eV) | Mo-3d Shift (eV) | S-2p (eV) | S-2p Shift (eV) |
|--------------------------------|------------|------------------|-----------|-----------------|
| $\text{MoS}_2$                 | 222.35     | 0.00             | 154.21    | 0.00            |
| $\text{Li}_{0.13}\text{MoS}_2$ | 221.83     | -0.52            | 153.77    | -0.44           |
| $\text{Li}_{0.25}\text{MoS}_2$ | 221.62     | -0.73            | 153.57    | -0.64           |
| $\text{Li}_{0.31}\text{MoS}_2$ | 221.54     | -0.81            | 153.47    | -0.74           |
| $\text{Li}_{0.50}\text{MoS}_2$ | 221.23     | -1.12            | 153.25    | -0.96           |
| $\text{Li}_{1.00}\text{MoS}_2$ | 220.15     | -2.19            | 152.46    | -1.75           |
| $\text{Li}_{2.00}\text{MoS}_2$ | 220.08     | -2.27            | 152.54    | -1.67           |

Part V:  $^7\text{Li}$  MAS NMR

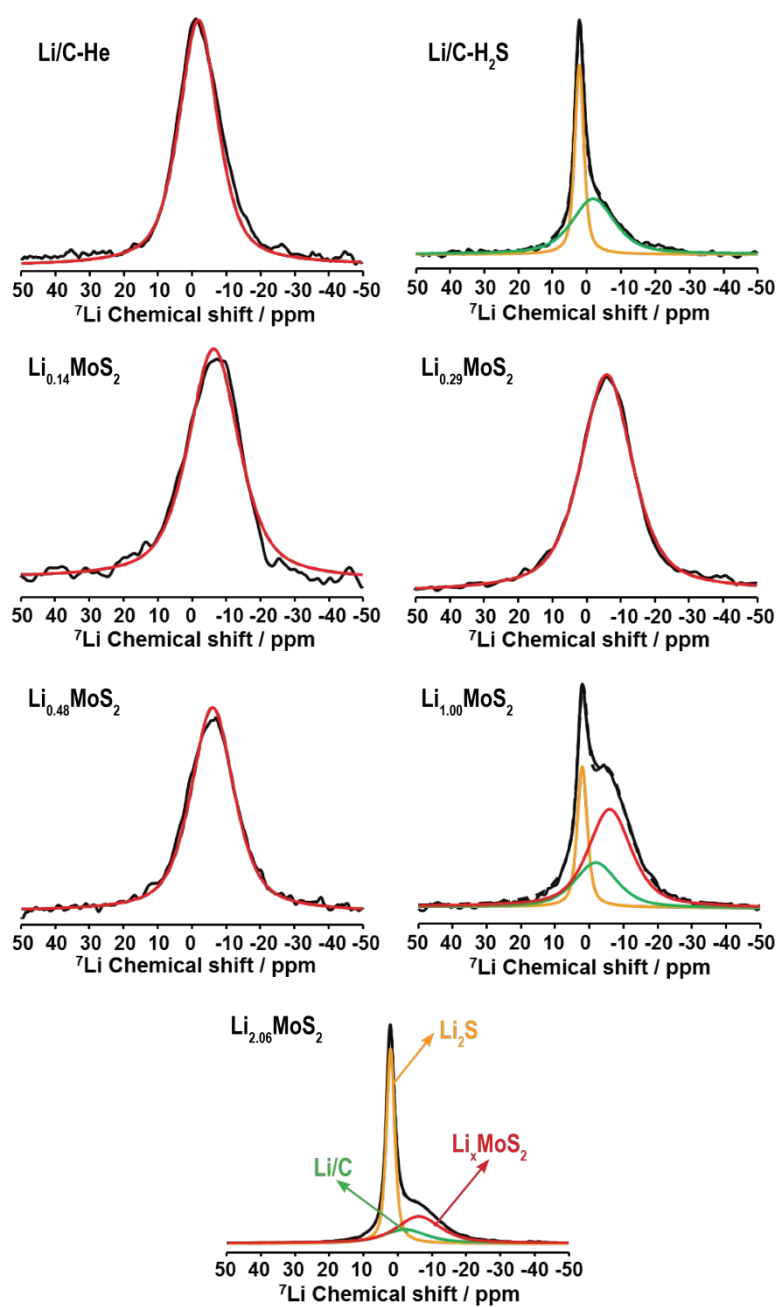

Figure S7. Solid-state Magic Angle Spinning  $^7\text{Li}$  NMR spectra of  $\text{Li}_x\text{MoS}_2$  on carbon support. Deconvolution of the NMR peaks are based on Gaussian (40 %)-Lorentz (60 %) line shape functions.



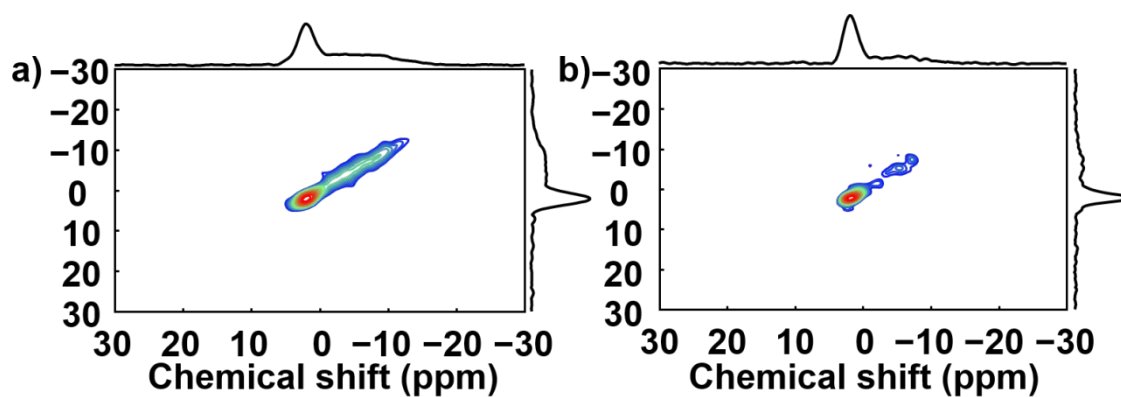

Figure S8.  ${}^7\text{Li}$ - ${}^7\text{Li}$  MAS 2D exchange (NOESY) NMR spectra of  $\text{Li}_{2.06}\text{MoS}_2/\text{C}$  with relaxation times of 10  $\mu\text{s}$  (a) and 100 ms (b).

#### Part VI: FTIR-NO adsorption spectroscopy

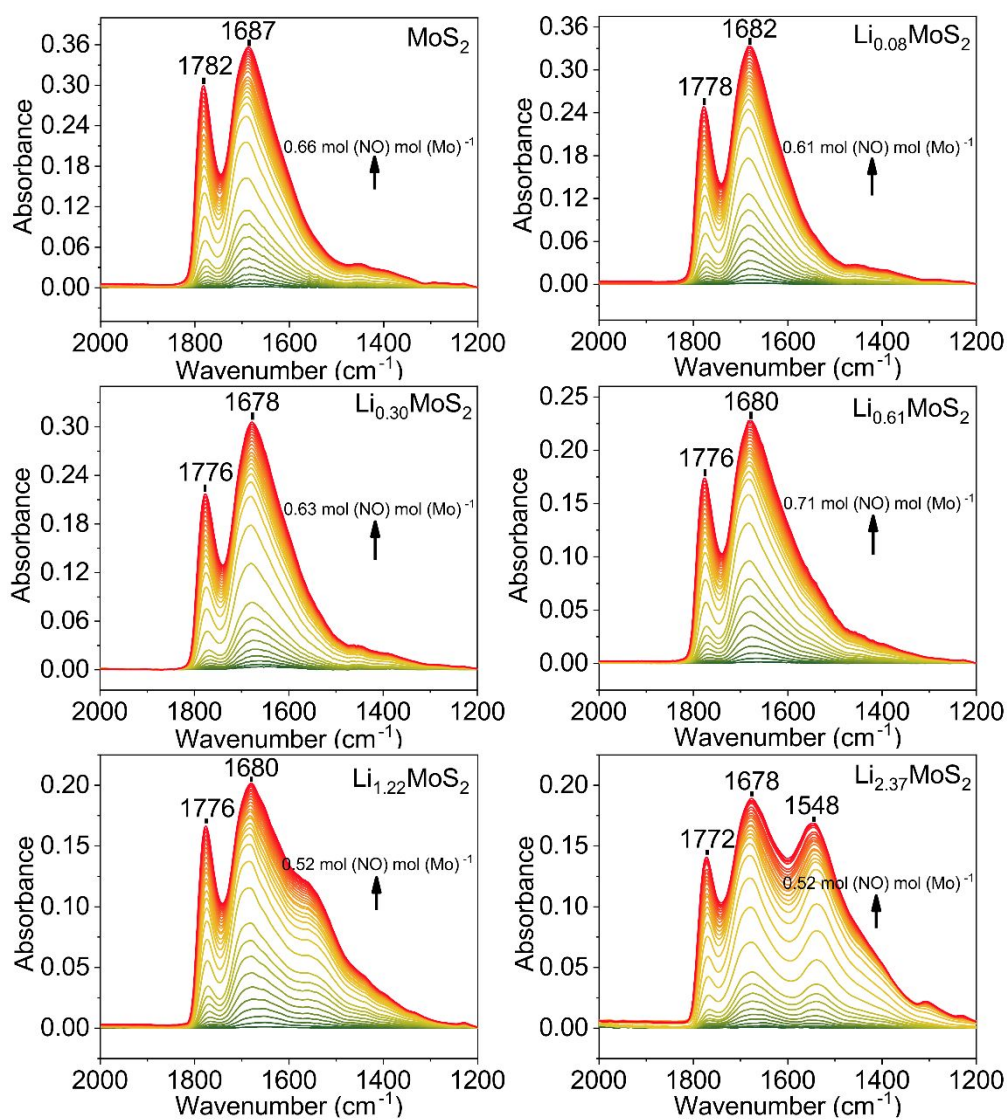

Figure S9. FTIR spectra of incremental doses of NO adsorbed on  $\text{Li}_x\text{MoS}_2/\text{Al}_2\text{O}_3$  pellets up to an equilibrium coverage of NO molecules.



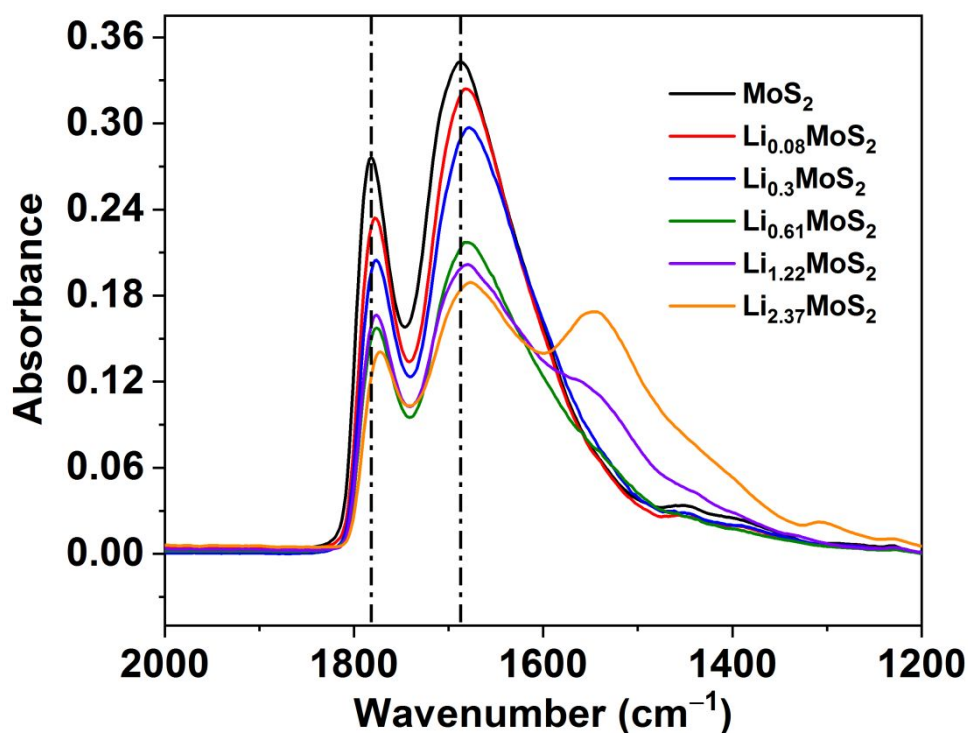

Figure S10. FTIR spectra of  $\text{Li}_x\text{MoS}_2/\text{Al}_2\text{O}_3$  after dosing NO with a molecular ratio of 0.52 to Mo.

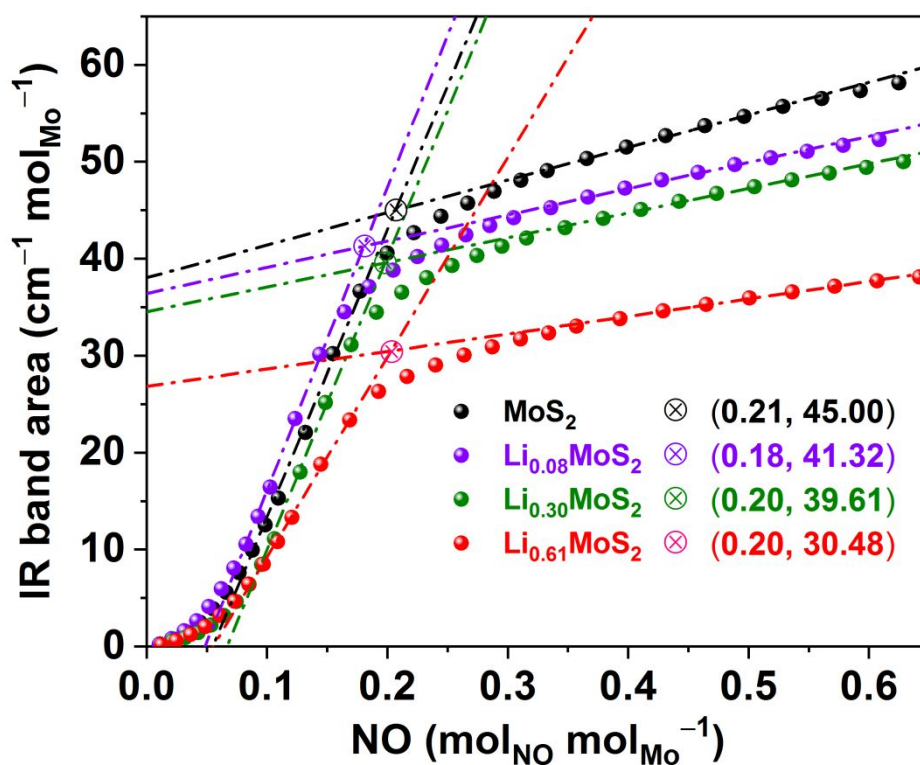

Figure S11. NO titration curve of  $\text{Li}_x\text{MoS}_2/\text{Al}_2\text{O}_3$  with IR band area integrated between 1500 and 1810  $\text{cm}^{-1}$ . The NO uptake was determined by the intersect between fitted linear lines of chemisorption and physisorption.

Even though the  $^7\text{Li}$  NMR spectra provide valuable insights into the interaction between Li ions and  $\text{MoS}_2$ , information about the edge structure of  $\text{MoS}_2$  in the presence of Li is still missing. However, such information can

be obtained indirectly via the adsorption of probe molecules monitored by infrared vibrational spectroscopy (IR).<sup>1</sup> Here, we have used NO as the probe molecule as it preferentially adsorbs on edge and corner sites of MoS<sub>2</sub>, thereby yielding insight into the properties of those sites.<sup>16, 17</sup> Figure 2e and Figure S9 and 10 display the scheme of NO adsorption on Li<sub>x</sub>MoS<sub>2</sub>. A gradual red-shift of the IR bands at ~1782 cm<sup>-1</sup> (coupled mononitrosyl or dinitrosyl, symmetric stretch, ν<sub>s</sub>) and ~1687 cm<sup>-1</sup> (coupled mononitrosyl or dinitrosyl, asymmetric stretch, ν<sub>as</sub>) (Figure 2e, Figure S10) is observed upon introduction of Li ions, which can be ascribed to the fact that Li increases the electron density of Mo atoms which is then back-donated to NO 2π\* orbitals. Importantly, quantitative NO adsorption may provide valuable information about the number of exposed edge sites (assigned as active sites). An objective comparison of the intrinsic properties of electrocatalyst activity requires knowledge of the electrochemically active surface area (ECSA), a parameter which often remains unknown. Here, the quantification of the number of edge sites makes it possible to derive more accurately structure-function correlations.<sup>18-20</sup> As shown in Figure S11, the NO titration curves of Mo display an NO uptake of ~0.2 mol<sub>NO</sub> mol<sub>Mo</sub><sup>-1</sup> for Li<sub>x</sub>MoS<sub>2</sub>.

#### Part VII: Bond structure in Li<sub>x</sub>MoS<sub>2</sub>

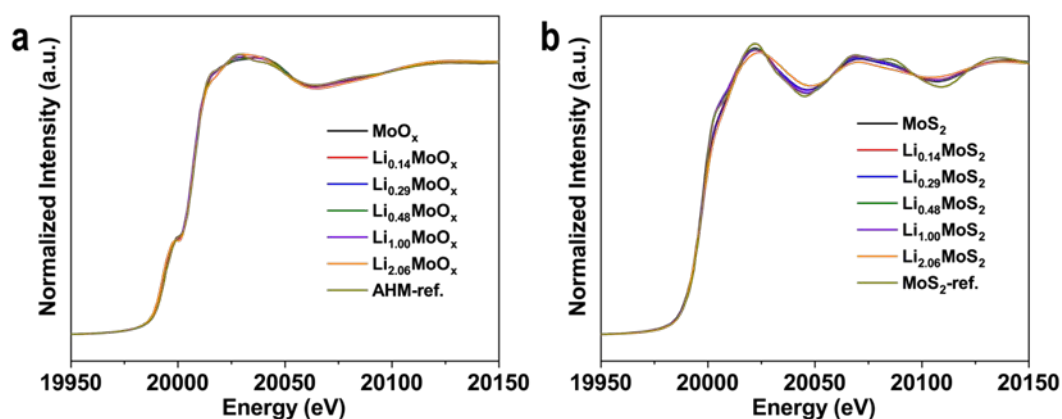

Figure S12. *Ex-situ* XANES spectra of Mo precursors (AHM) loaded on carbon support before (a) and after (b) sulfurization.

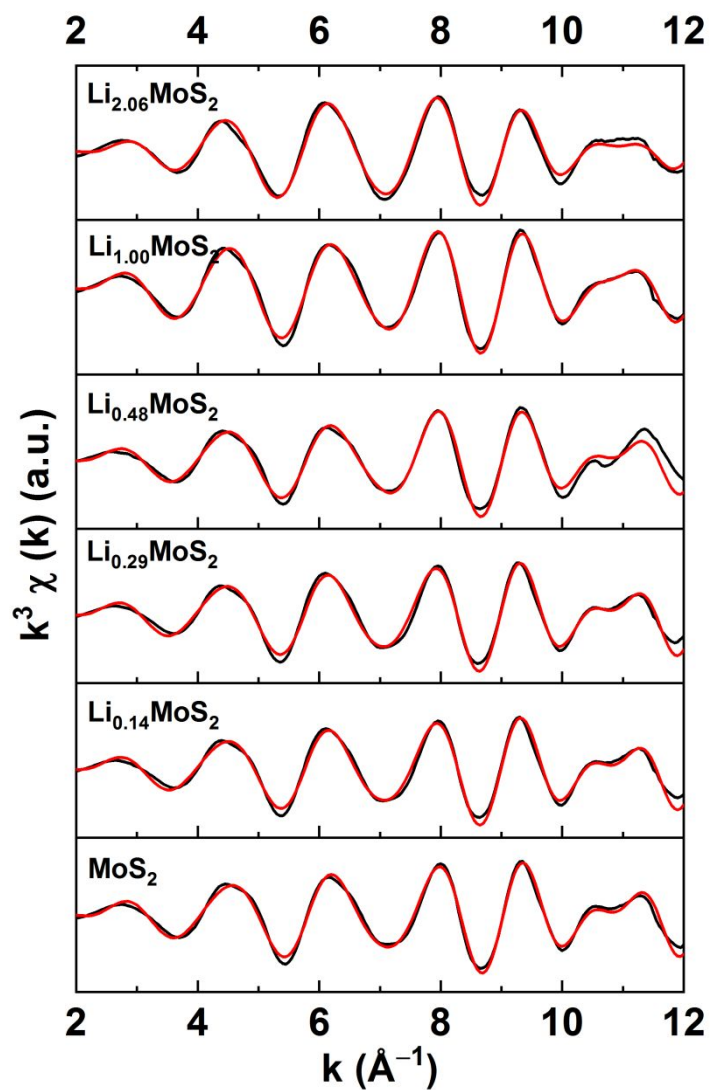

Figure S13. Mo-K edge EXAFS spectra plotted as  $\chi(k)$  with k-weight of 3. Black curves represent experimental data and red curves show the fitted spectra.

Table S6: Average charge ( $Q$ ) and variance with respect to the  $\text{MoS}_2$  ( $\Delta Q$ ) for Mo and S atoms in a  $\text{Li}_x\text{MoS}_2$  monolayer.

| Species                        | Mo      |                  | S       |                  |
|--------------------------------|---------|------------------|---------|------------------|
|                                | $Q/e^-$ | $ \Delta Q /e^-$ | $Q/e^-$ | $ \Delta Q /e^-$ |
| $\text{MoS}_2$                 | 1.18    |                  | -0.59   |                  |
| $\text{Li}_{0.13}\text{MoS}_2$ | 1.09    | 0.09             | -0.61   | 0.02             |
| $\text{Li}_{0.25}\text{MoS}_2$ | 1.10    | 0.08             | -0.65   | 0.09             |
| $\text{Li}_{0.31}\text{MoS}_2$ | 1.09    | 0.09             | -0.70   | 0.11             |
| $\text{Li}_{0.50}\text{MoS}_2$ | 1.04    | 0.14             | -0.77   | 0.18             |
| $\text{Li}_{1.00}\text{MoS}_2$ | 0.85    | 0.33             | -0.90   | 0.31             |
| $\text{Li}_{2.00}\text{MoS}_2$ | 0.64    | 0.54             | -1.31   | 0.72             |

Table S7: DFT calculated Mo-S and Mo-Mo bond distances ( $\text{\AA}$ ) in a  $\text{Li}_x\text{MoS}_2$  monolayer.

| Sample name                    | Mo-S  | Mo-Mo | Short (Mo-Mo) | Li-S  | Li-Mo |
|--------------------------------|-------|-------|---------------|-------|-------|
| $\text{MoS}_2$                 | 2.421 | 3.192 | ---           | ---   | ---   |
| $\text{Li}_{0.13}\text{MoS}_2$ | 2.419 | 3.145 | 2.947/3.638   | 2.213 | 2.871 |
| $\text{Li}_{0.25}\text{MoS}_2$ | 2.418 | 3.146 | 2.921/3.802   | 2.328 | 3.002 |
| $\text{Li}_{0.31}\text{MoS}_2$ | 2.402 | 3.146 | 2.885         | 2.332 | 2.975 |
| $\text{Li}_{0.50}\text{MoS}_2$ | 2.316 | 3.228 | 2.902         | 2.258 | 3.051 |
| $\text{Li}_{1.00}\text{MoS}_2$ | 2.429 | 3.122 | 2.740         | 2.299 | 2.799 |
| $\text{Li}_{2.00}\text{MoS}_2$ | 2.460 | 3.294 | 2.802         | 2.331 | 2.950 |

Part VIII: Electrochemical characterization

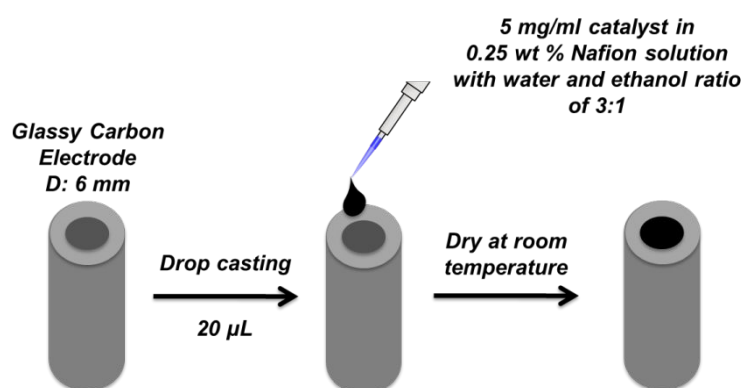

Figure S14. Scheme for the preparation of  $\text{Li}_x\text{MoS}_2/\text{C}$  electrodes for electrochemical characterizations.

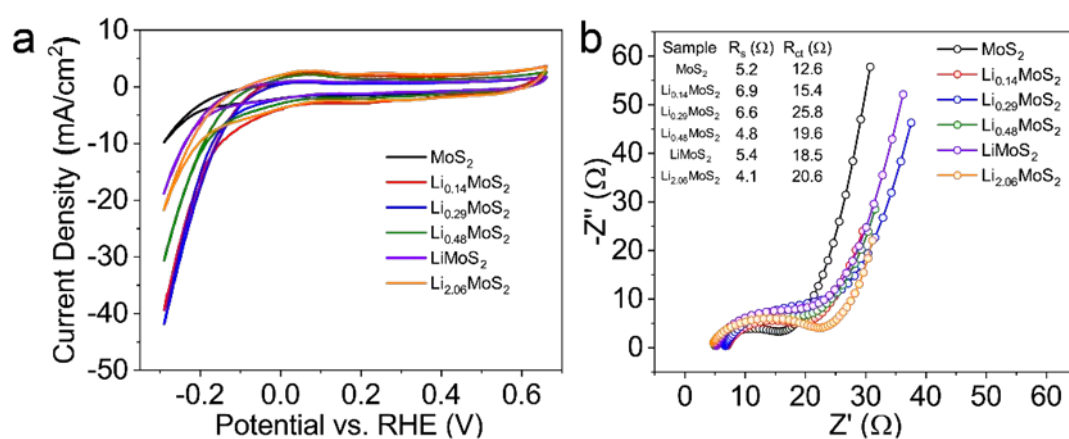

Figure S15. a) Cyclic voltammetry curves of  $\text{Li}_x\text{MoS}_2$  in 0.1 M  $\text{H}_2\text{SO}_4$  with rotating speed of 1600 rpm. Scan rate: 50 mV/s. b) Electrochemical impedance spectroscopy (EIS) collected at open circuit potential ( $V_{\text{OCP}}$ ) in 0.1 M  $\text{H}_2\text{SO}_4$  with an AC amplitude of 10 mV.

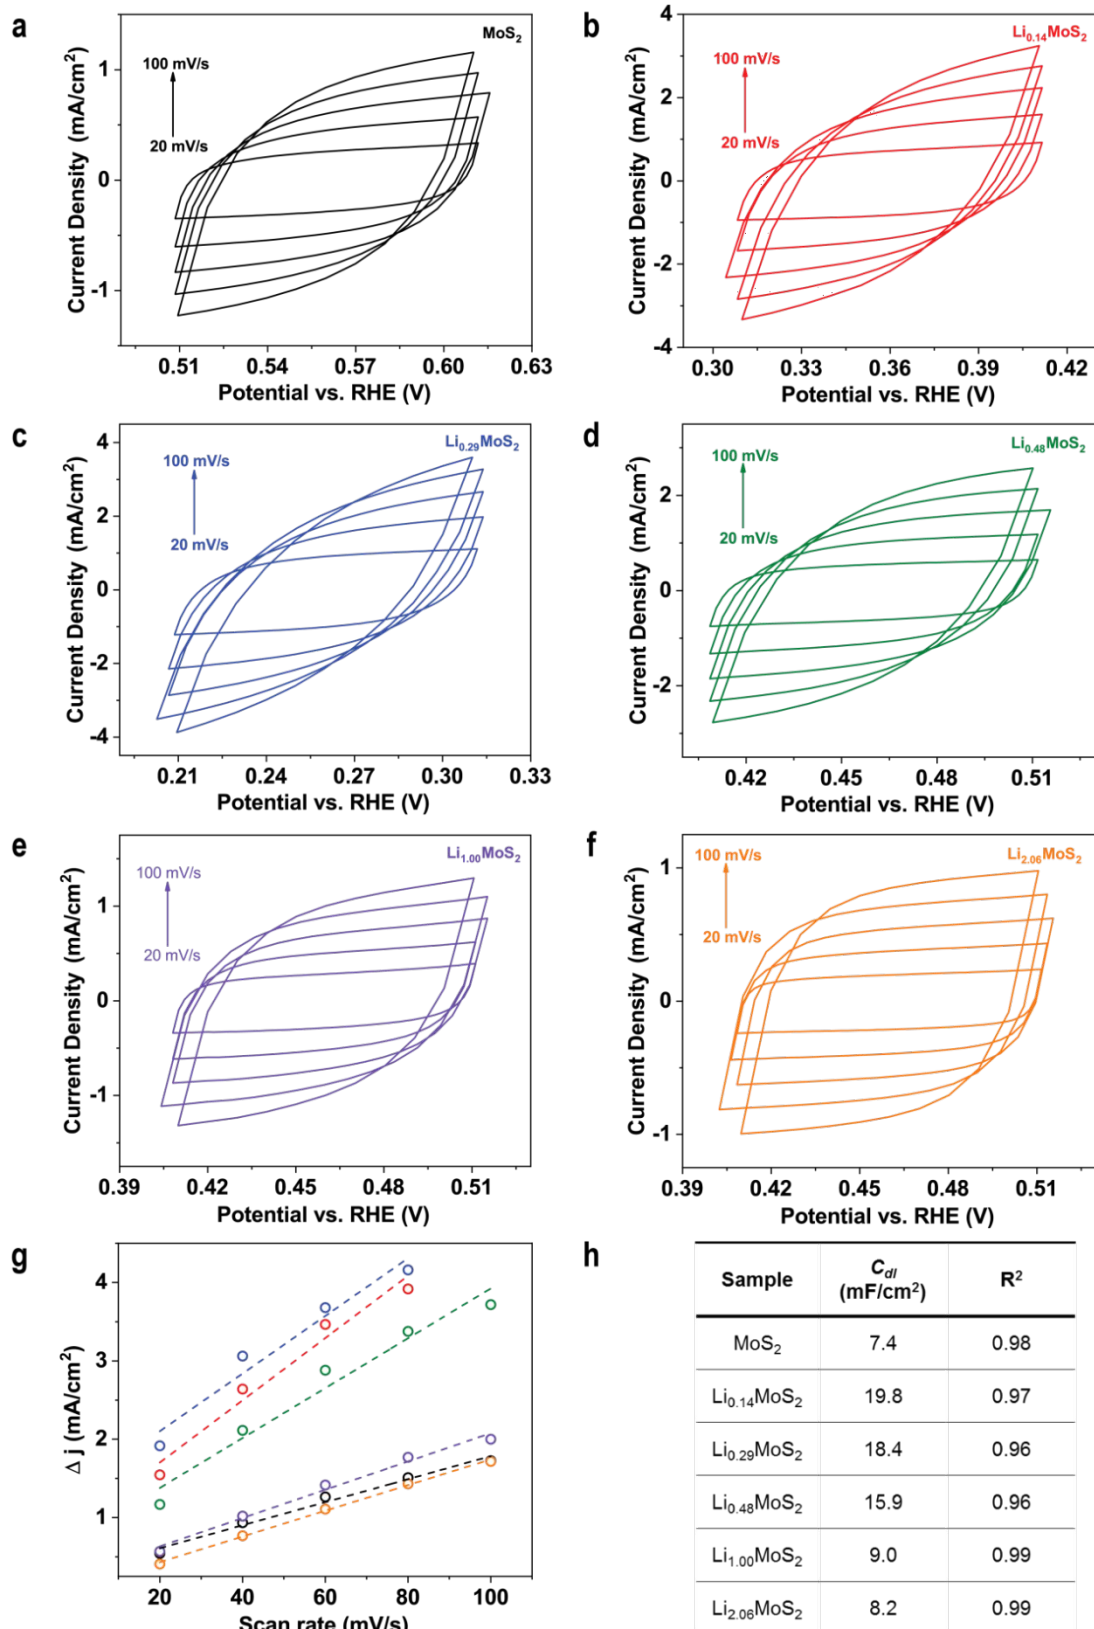

Figure S16. Electrochemical double layer capacitance ( $C_{dl}$ ) measurements for  $\text{Li}_x\text{MoS}_2$ . a-f) Cyclic voltammetry (CV) measurements in the potential range of  $V_{OCP}$  (open circuit potential)  $\pm 50$  mV; g) fitting plots showing the extraction of corresponding  $C_{dl}$ ; h) summary of  $C_{dl}$  obtained from fitting plots of (g). Color codes in g are the same used in panels a-f.

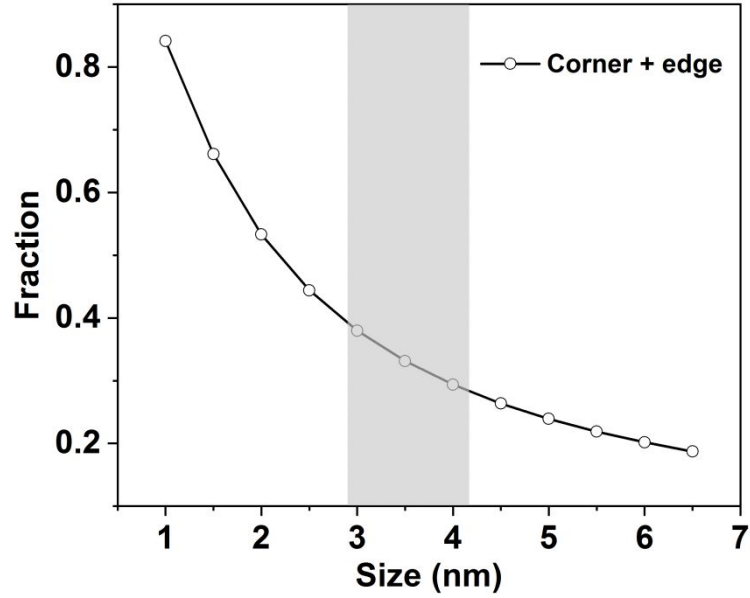

Figure S17. Calculated fraction of molybdenum atoms in hexagonal MoS<sub>2</sub> nanoparticles at corner and edge sites as a function of particle size.

Table S8. Calculated number of active sites ( $N_{active}$ ) for Li<sub>x</sub>MoS<sub>2</sub>/C drop casted on glassy carbon electrodes based on NO titration (Figure S11)

| Sample                              | $N_{active\ total}$   | $N_{active\ cm^{-1}}$ |
|-------------------------------------|-----------------------|-----------------------|
| MoS <sub>2</sub>                    | $1.05 \times 10^{16}$ | $2.96 \times 10^{15}$ |
| Li <sub>0.14</sub> MoS <sub>2</sub> | $1.08 \times 10^{16}$ | $3.07 \times 10^{15}$ |
| Li <sub>0.29</sub> MoS <sub>2</sub> | $1.06 \times 10^{16}$ | $3.00 \times 10^{15}$ |
| Li <sub>0.48</sub> MoS <sub>2</sub> | $1.02 \times 10^{16}$ | $2.89 \times 10^{15}$ |
| Li <sub>1.00</sub> MoS <sub>2</sub> | $1.00 \times 10^{16}$ | $2.84 \times 10^{15}$ |
| Li <sub>2.06</sub> MoS <sub>2</sub> | $8.26 \times 10^{15}$ | $2.33 \times 10^{15}$ |

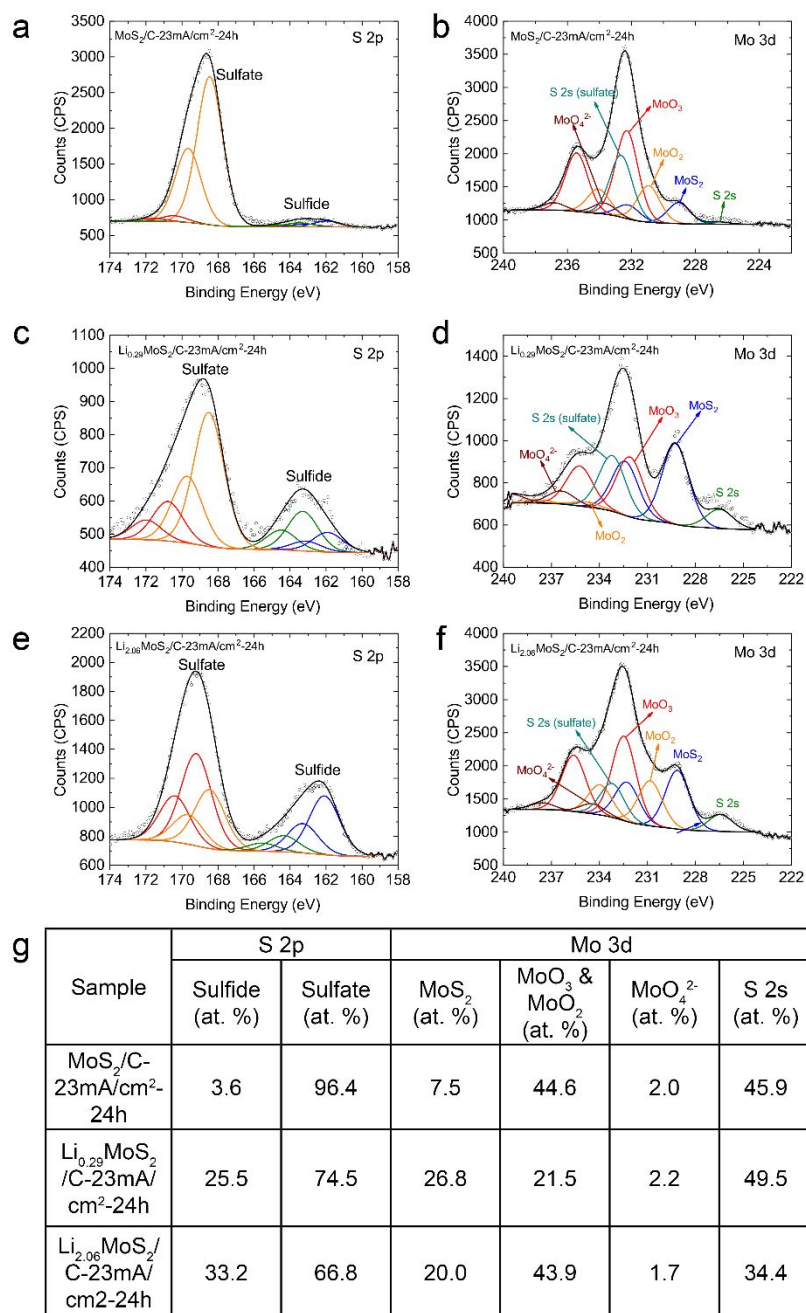

Figure S18. XPS spectra of S 2p (a, c, e) and Mo 3d (b, d, f) for  $\text{Li}_x\text{MoS}_2$  catalysts after HER stability test at 23  $\text{mA}/\text{cm}^2$  for 24 h. g, Summary of atomic ratios of different components based on XPS analysis of S 2p and Mo 3d.

According to the Pourbaix diagrams reported for the Mo-H<sub>2</sub>O-S system in the literature<sup>21,22</sup>, the  $\text{Li}_x\text{MoS}_2$  materials have been operated in the stability window of MoS<sub>2</sub> during long term HER stability testing ( $\text{pH} \sim 0.7$ ,  $-0.5 \text{ V} < E_{\text{RHE}} < -0.2 \text{ V}$ ). We therefore surmise that the observed oxidation (XPS) (Figure S18) is due to exposure of the samples to moist air after catalytic testing.



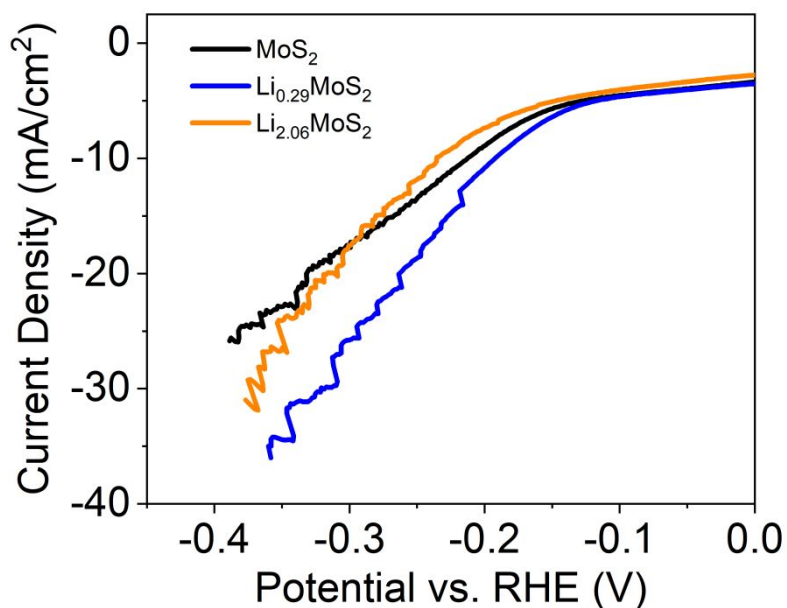

Figure S19. Linear sweep voltammetry (LSV) curves (corrected by uncompensated resistance) of  $\text{Li}_x\text{MoS}_2$  catalysts on glassy carbon electrode (GCE) after washing with MilliQ water.

#### Part IX: Raman spectroscopy

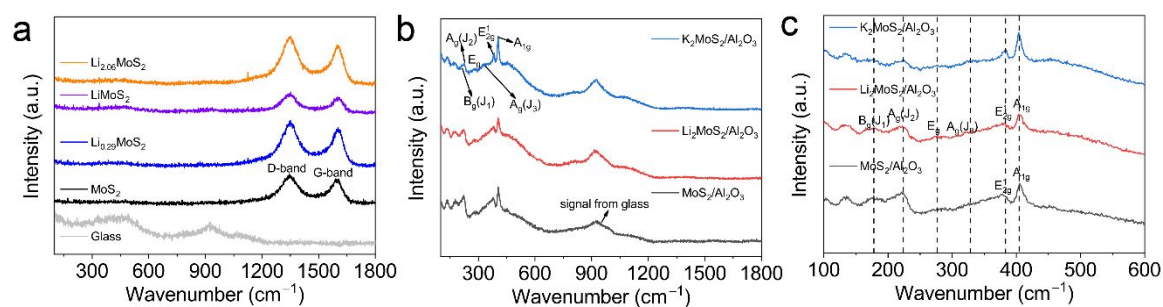

Figure S20. Raman spectra of C-supported  $\text{Li}_x\text{MoS}_2$  catalysts (a) with increasing lithium content and  $\text{A}_2\text{MoS}_2$  ( $\text{A}=\text{Li}, \text{K}$ ) on  $\gamma\text{-Al}_2\text{O}_3$  (b, c). Samples were sealed in a glovebox on a glass slide with Kapton tape and a glass coverslip to protect samples from air exposure during Raman measurements.

Part IIX: Hydrogen adsorption on  $\text{Li}_x\text{MoS}_2$

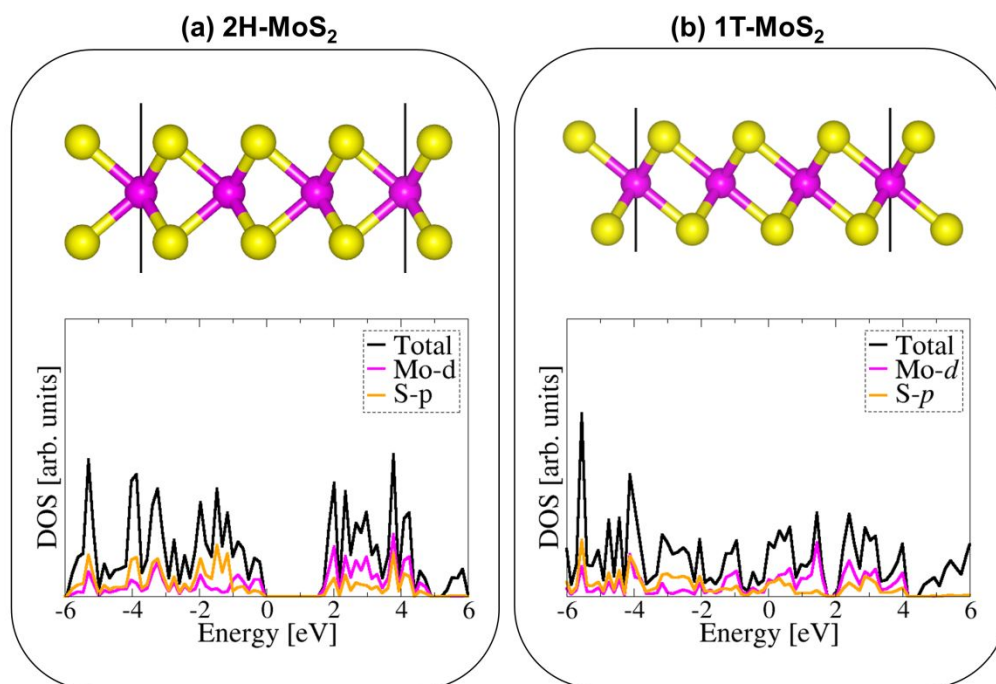

Figure S21. Structures and PDOS (partial density of state) of 2H (a) and 1T (b) MoS<sub>2</sub> monolayers. The Fermi level is located at 0 eV.

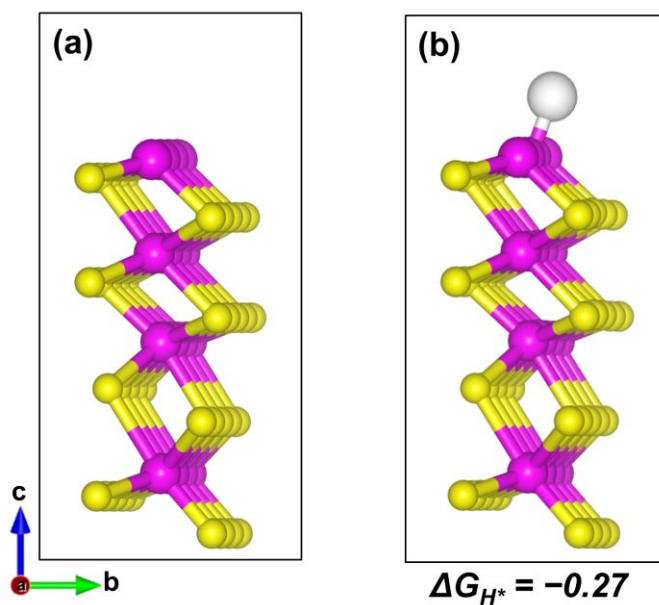

Figure S22. Structure of pristine Mo-edge of 1T-MoS<sub>2</sub> monolayer without (a) and with (b) hydrogen adsorption. Vacuum size in the *c*-direction perpendicular to the Mo-edge is 20 Å.

Table S9. Calculated vibrational frequencies of H adsorbed on the Mo-edge of  $\text{Li}_x\text{MoS}_2$  monolayer with different Li concentrations.

|                                | $\nu$ (H adsorbed) $\text{cm}^{-1}$ |          |         |
|--------------------------------|-------------------------------------|----------|---------|
| $\text{MoS}_2$                 | 1815.039                            | 405.1186 | 344.175 |
| $\text{Li}_{0.13}\text{MoS}_2$ | 1714.376                            | 913.126  | 572.289 |
| $\text{Li}_{0.25}\text{MoS}_2$ | 1551.974                            | 848.863  | 230.782 |
| $\text{Li}_{0.31}\text{MoS}_2$ | 1676.075                            | 998.345  | 231.534 |
| $\text{Li}_{0.50}\text{MoS}_2$ | 1676.900                            | 895.399  | 418.019 |
| $\text{Li}_{1.00}\text{MoS}_2$ | 1478.690                            | 826.382  | 449.450 |
| $\text{Li}_{2.00}\text{MoS}_2$ | 1484.766                            | 936.590  | 459.449 |

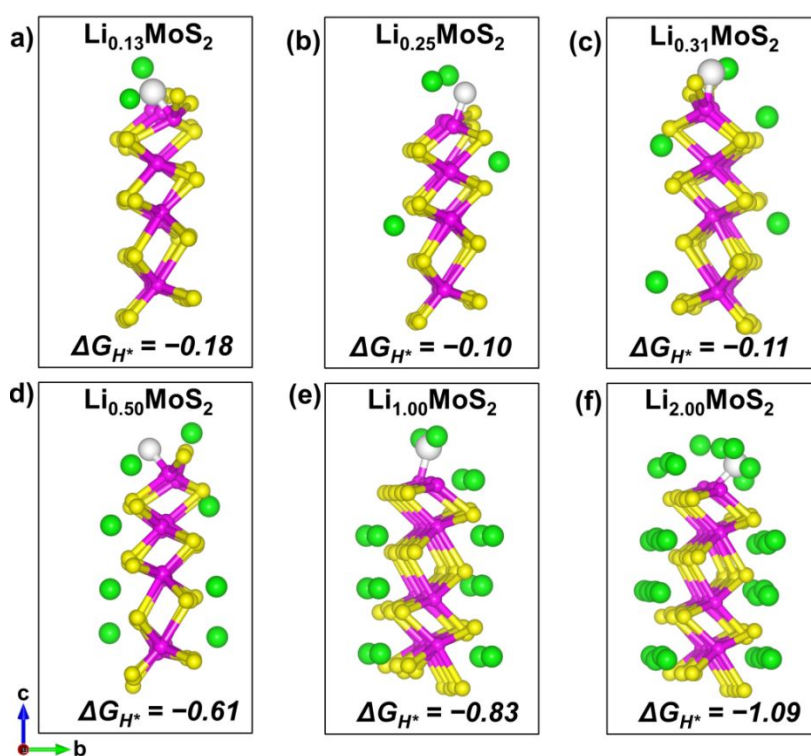

Figure S23. Calculated Gibbs free energy (eV) for hydrogen adsorption on Mo-edge of  $\text{Li}_x\text{MoS}_2$  monolayer with different Li concentrations. a,  $\text{Li}_{0.13}\text{MoS}_2$ ; b,  $\text{Li}_{0.25}\text{MoS}_2$ ; c,  $\text{Li}_{0.31}\text{MoS}_2$ ; d,  $\text{Li}_{0.50}\text{MoS}_2$ ; e,  $\text{Li}_{1.00}\text{MoS}_2$ ; f,  $\text{Li}_{2.00}\text{MoS}_2$ . Vacuum size in the  $c$  direction perpendicular to the Mo-edge is 20 Å.

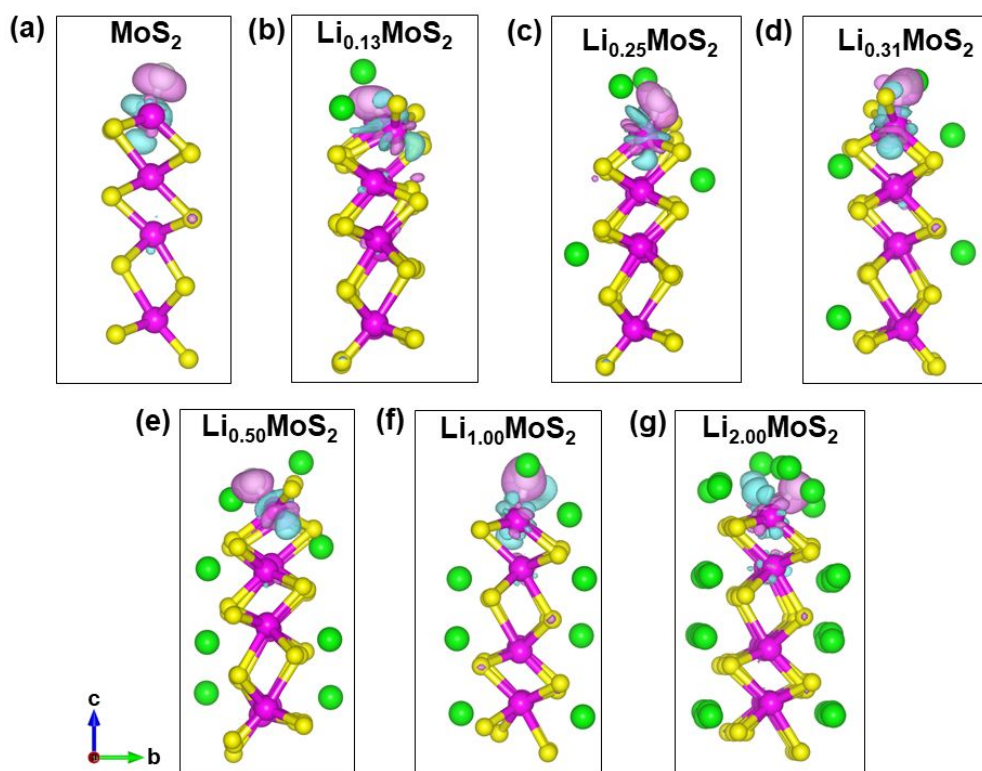

Figure S24. Electron density difference isosurface contours of H adsorption Mo-edge of  $\text{Li}_x\text{MoS}_2$  monolayer with different Li concentrations, where the pink and cyan contours indicate electron density increase and decrease by  $0.02 \text{ e}^- \text{ \AA}^{-3}$ , respectively. a,  $\text{MoS}_2$ ; b,  $\text{Li}_{0.13}\text{MoS}_2$ ; c,  $\text{Li}_{0.25}\text{MoS}_2$ ; d,  $\text{Li}_{0.31}\text{MoS}_2$ ; e,  $\text{Li}_{0.50}\text{MoS}_2$ ; f,  $\text{Li}_{1.00}\text{MoS}_2$ ; g,  $\text{Li}_{2.00}\text{MoS}_2$ .

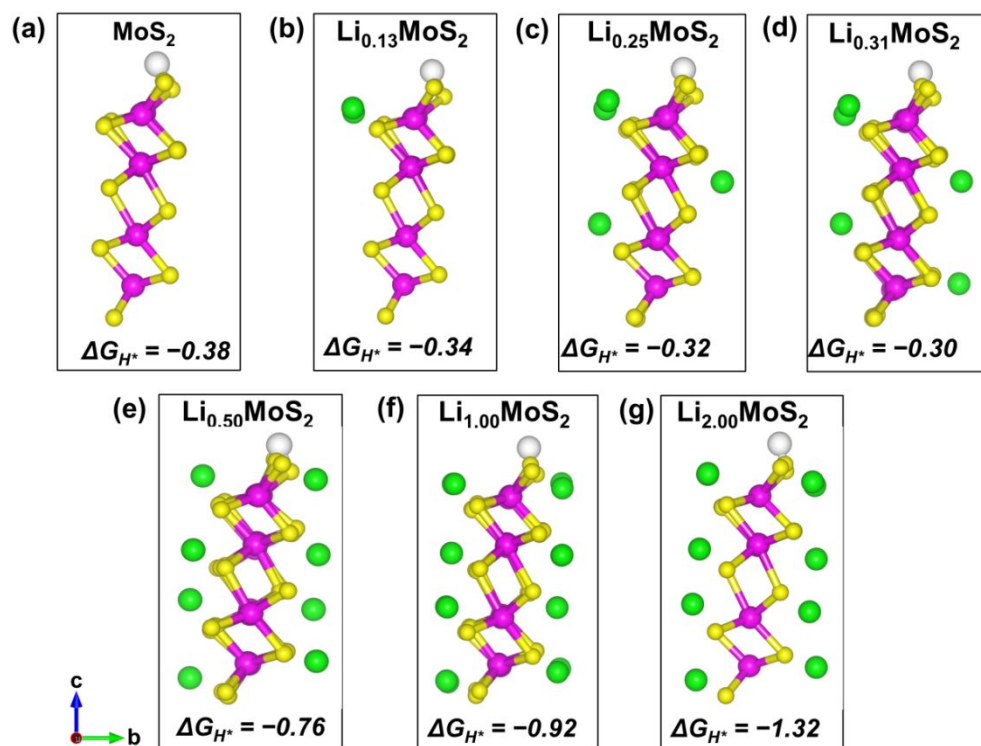

Figure S25. Calculated Gibbs free energy (eV) for hydrogen adsorption on S-edge of  $\text{Li}_x\text{MoS}_2$  monolayer with different Li concentrations. Vacuum size in the c direction perpendicular to the Mo-edge is of  $20 \text{ \AA}$ . a,  $\text{MoS}_2$ ; b,  $\text{Li}_{0.13}\text{MoS}_2$ ; c,  $\text{Li}_{0.25}\text{MoS}_2$ ; d,  $\text{Li}_{0.31}\text{MoS}_2$ ; e,  $\text{Li}_{0.50}\text{MoS}_2$ ; f,  $\text{Li}_{1.00}\text{MoS}_2$ ; g,  $\text{Li}_{2.00}\text{MoS}_2$ .

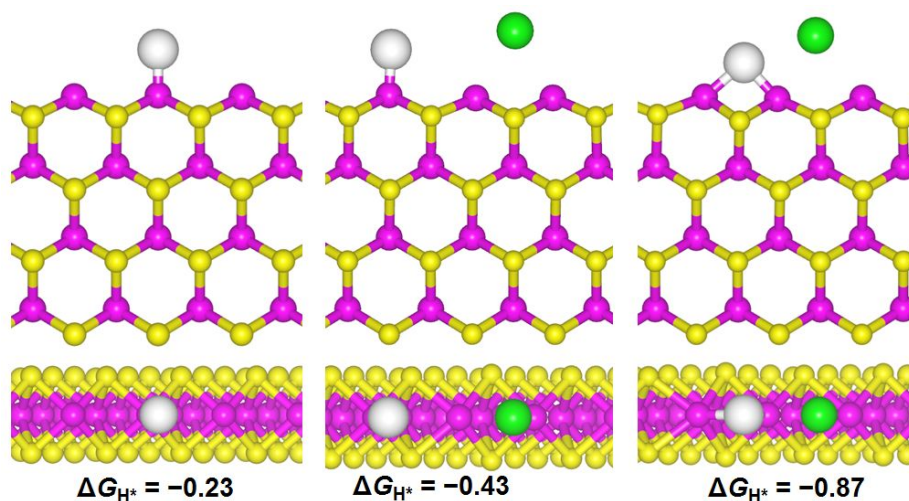

Figure S26. Calculated Gibbs free energies (eV) for hydrogen adsorption on Mo-edges of 2H-MoS<sub>2</sub> monolayer with and without Li adsorption. Vacuum size in the *c* direction perpendicular to the Mo-edge is 20 Å.

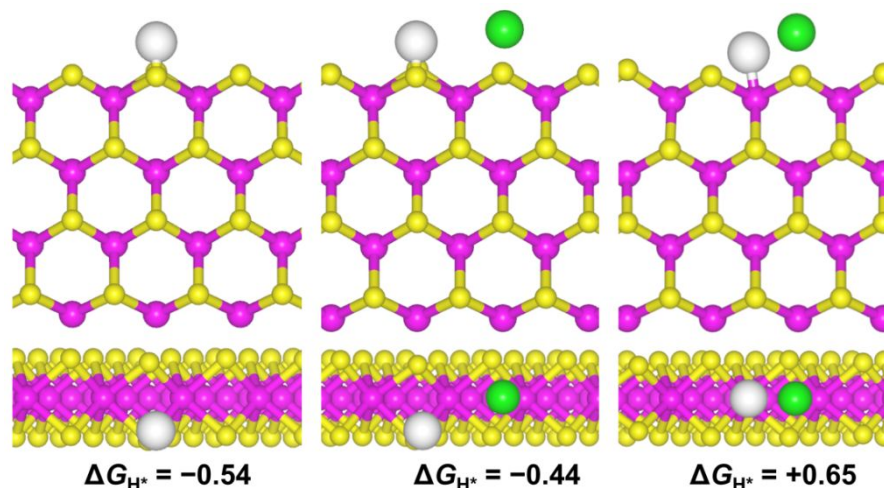

Figure S27. Calculated Gibbs free energy (eV) for hydrogen adsorption on S-edges of 2H-MoS<sub>2</sub> monolayer with and without Li adsorption. Vacuum size in the *c* direction perpendicular to the S-edge is 20 Å.

## References

1. van Haandel, L.; Hensen, E. J. M.; Weber, Th. FT-IR Study of NO Adsorption on MoS<sub>2</sub>/Al<sub>2</sub>O<sub>3</sub> Hydrodesulfurization Catalysts: Effect of Catalyst Preparation. *Catalysis Today* **2017**, *292*, 67-73.
2. Kresse, G.; Furthmüller, J. Efficiency of Ab-initio Total Energy Calculations for Metals and Semiconductors Using a Plane-wave Basis set. *J. Comput. Mat. Sci.* **1996**, *6*, 15-50.
3. Kresse, G.; Hafner, J. Ab Initio Molecular Dynamics for Liquid Metals. *J. Phys. Rev. B.* **1993**, *47*, 558-561.
4. Blöchl, P. E. Projector Augmented-wave Method. *Phys. Rev. B.* **1994**, *50*, 17953-17979.
5. Perdew, J. P.; Burke, K. Ernzerhof, M. Generalized Gradient Approximation Made Simple. *Phys. Rev. Lett.* **1996**, *77*, 3865-3868.
6. Monkhorst, H. J.; Pack, J. D. Special Points for Brillouin-zone Integrations. *Phys. Rev. B.* **1976**, *13*, 5188-5192.



7. Grimme, S.; Antony, J.; Ehrlich, S.; Krieg, S. A Consistent and Accurate Ab Initio Parametrization of Density Functional Dispersion Correction (DFT-D) for the 94 Elements H-Pu. *J. Chem. Phys.* **2010**, *132*, 154104.
8. Tang, Q.; Jiang, D.-e. Stabilization and Band-Gap Tuning of the 1T-MoS<sub>2</sub> Monolayer by Covalent Functionalization. *Chem. Mater.* **2015**, *27*, 3743–3748.
9. Henkelman, G.; Arnaldsson, A.; Jónsson, H. A Fast and Robust Algorithm for Bader Decomposition of Charge Density. *Comput. Mater. Sci.* **2006**, *36*, 354–360.
10. Bagus, P. S.; Illas, F.; Pacchioni, G.; Parmigiani, F. Mechanisms Responsible for Chemical Shifts of Core-level Binding Energies and Their Relationship to Chemical Bonding. *J. Electron Spectros. Relat. Phenomena*, **1999**, *100*, 215-236.
11. Bellafont, N. P.; Viñes, F.; Hieringer, W.; Illas, F. Predicting Core Level Binding Energies Shifts: Suitability of the Projector Augmented Wave Approach as Implemented in VASP. *J. Comput. Chem.* **2017**, *38*, 518–522.
12. Bellafont, N. P.; Viñes, F.; Illas, F. Performance of the TPSS Functional on Predicting Core Level Binding Energies of Main Group Elements Containing Molecules: A Good Choice for Molecules Adsorbed on Metal Surfaces *J. Chem. Theory Comput.* **2016**, *12*, 324-331.
13. Bellafont, N. P.; Saiz, G. A.; Viñes, F.; Illas, F. Performance of Minnesota Functionals on Predicting Core-level Binding Energies of Molecules Containing Main-group Elements. *Theor. Chem. Acc.* **2016**, *135*, 35.
14. Jiao, Y.; Zheng, Y.; Jaroniec, M.; Qiao, S. Z. Design of Electrocatalysts for Oxygen- and Hydrogen-involving Energy Conversion Reactions. *Chem. Soc. Rev.* **2015**, *44*, 2060–2086.
15. Greeley, J.; Jaramillo, T. F.; Bonde, J.; Chorkendorff, I.; Nørskov, J. K. Computational High-throughput Screening of Electrocatalytic Materials for Hydrogen Evolution. *Nat. Mater.* **2006**, *5*, 909-913.
16. Nørskov, J. K.; Bligaard, T.; Logadottir, A.; Kitchin, J. R.; Chen, J. G.; Pandelov, S.; Stimming, U. Trends in the Exchange Current for Hydrogen Evolution. *J. Electrochem. Soc.* **2005**, *152*, J23-J26.
17. Topsøe, N. Y.; Topsøe, H. Characterization of the Structures and Active Sites in Sulfided Co-Mo/Al<sub>2</sub>O<sub>3</sub> and Ni-Mo/Al<sub>2</sub>O<sub>3</sub> Catalysts by NO Chemisorption. *J. Catal.* **1983**, *84*, 386-401.
18. Yoon, Y.; Yan, B.; Surendranath, Y. Suppressing Ion Transfer Enables Versatile Measurements of Electrochemical Surface Area for Intrinsic Activity Comparisons. *J. Am. Chem. Soc.* **2018**, *140*, 2397-2400.
19. McCrory, C. C.; Jung, S.; Ferrer, I. M.; Chatman, S. M.; Peters, J. C.; Jaramillo, T. F. Benchmarking Hydrogen Evolving Reaction and Oxygen Evolving Reaction Electrocatalysts for Solar Water Splitting Devices. *J. Am. Chem. Soc.* **2015**, *137*, 4347-4357.
20. Hinnemann, B.; Moses, P. G.; Bonde, J.; Jørgensen, K. P.; Nielsen, J. H.; Horch, S.; Chorkendorff, I.; Nørskov, J. K. Biomimetic Hydrogen Evolution: MoS<sub>2</sub> Nanoparticles as Catalyst for Hydrogen Evolution. *J. Am. Chem. Soc.* **2005**, *127*, 5308-5309.
21. Huang, Y.; Nielsen R. J.; Goddard III, W. A.; Soriaga, M. P. The Reaction Mechanism with Free Energy Barriers for Electrochemical Dihydrogen Evolution on MoS<sub>2</sub>. *J. Am. Chem. Soc.* **2015**, *137*, 6692-6698.
22. Davoodi, A.; Pakshir, M.; Babaiee, M.; Ebrahimi, G.R. A Comparative H<sub>2</sub>S Corrosion Study of 304L and 316L Stainless Steels in Acidic Media. *Corrosion Sci.* **2011**, *53*, 399-408.
